# Supplementary material
Source: MDPI journal article supplement (https://www.mdpi.com/2304-6740/11/9/374)
Supplement: s1 [file s1]

## Supplemental Information

### **Manganese(I) diamine electrocatalysts: Electrochemical carbon dioxide reduction to carbon monoxide**

Badrinath Dhakal,<sup>1</sup> Brooke A. Corbin,<sup>1</sup> Alberto Sosa Parada,<sup>2</sup> Jonathan G. Sakai,<sup>2</sup> Emily A. Felton,<sup>3</sup> Lauren T. McDonald,<sup>2</sup> Anthony J. Gross,<sup>2</sup> Gary S. Nichol,<sup>4</sup> and Greg A. N. Felton<sup>\*2</sup>

<sup>1</sup>*Department of Chemistry, Oakland University, Rochester, MI 48309, USA*

<sup>2</sup>*Department of Chemistry, Eckerd College, St. Petersburg, FL 33711, USA*

<sup>3</sup>*Department of Biology, University of Tampa, Tampa, FL 33606, USA*

<sup>4</sup>*School of Chemistry, University of Edinburgh, Edinburgh, EH9 3FJ, UK*

#### **Contents**

##### Page

|    |                                                                                                                                                                                                             |
|----|-------------------------------------------------------------------------------------------------------------------------------------------------------------------------------------------------------------|
| 2  | Scheme S1: Proposed electrocatalytic mechanism                                                                                                                                                              |
| 3  | Figure S1: Cyclic Voltammetry (CV) of <b>Mn-1</b> under Ar                                                                                                                                                  |
| 4  | Figure S2: CV of <b>Mn-2</b> under Ar                                                                                                                                                                       |
| 5  | Figure S3: CV of <b>Re-1</b> under Ar                                                                                                                                                                       |
| 6  | Figure S4: CV of <b>Mn-2</b> under CO <sub>2</sub> with additions of trifluoroethanol                                                                                                                       |
| 7  | Figure S5: CV of <b>Re-1</b> under CO <sub>2</sub> with additions of trifluoroethanol                                                                                                                       |
| 8  | Figure S6: CV without catalyst under CO <sub>2</sub> with additions of trifluoroethanol                                                                                                                     |
| 9  | Figure S7: CV of <b>Mn-2</b> under CO <sub>2</sub> with additions of water                                                                                                                                  |
| 10 | Figure S8: UV/Vis spectra of <b>Mn-1</b> , <b>Mn-2</b> and <b>Re-1</b>                                                                                                                                      |
| 11 | Figure S9: FTIR Spectra of <b>Mn-1</b><br>Figure S10: FTIR Spectra of <b>Re-1</b>                                                                                                                           |
| 12 | Figure S11: FTIR Spectra of <b>Mn-2</b> (including after bulk electrolysis)                                                                                                                                 |
| 13 | Figure S12: <sup>1</sup> H NMR (300 MHz, (CD <sub>3</sub> ) <sub>2</sub> CO) spectra of <b>Mn-1</b><br>Figure S13: <sup>1</sup> H NMR (400 MHz, (CD <sub>3</sub> ) <sub>2</sub> CO) spectra of <b>Re-1</b>  |
| 14 | Figure S14: <sup>1</sup> H NMR (300 MHz, (CD <sub>3</sub> ) <sub>2</sub> CO) spectra of <b>Mn-2</b><br>Figure S15: <sup>13</sup> C NMR (400 MHz, (CD <sub>3</sub> ) <sub>2</sub> CO) spectra of <b>Mn-2</b> |
| 15 | Figure S16: Elemental analyses for <b>Mn-1</b> , <b>Mn-2</b> , <b>Re-1</b>                                                                                                                                  |
| 16 | Table S1: Comparison of elemental analysis to proposed structures                                                                                                                                           |
| 17 | Figure S17: Decomposition upon exposure to ambient light                                                                                                                                                    |
| 18 | Figure S18: Fluorescence of <b>Mn-1</b> and <b>Mn-2</b>                                                                                                                                                     |
| 19 | Figure S19. Gas Chromatography calibration standards of CO and H <sub>2</sub>                                                                                                                               |
| 20 | Figure S20: Background CV recorded in argon and CO <sub>2</sub> -saturated acetonitrile                                                                                                                     |
| 21 | X-ray crystallography details of <b>Mn-2</b> and <b>Re-1</b>                                                                                                                                                |

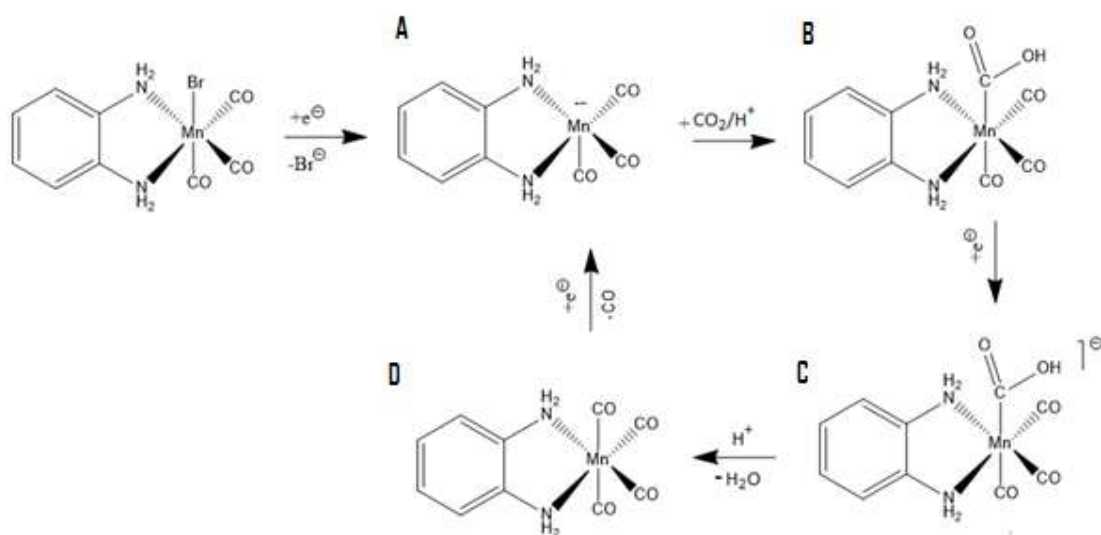

**Scheme S1.** A proposed mechanism for the electrocatalytic reduction of CO<sub>2</sub> by manganese (I) diamine catalysts. The catalyst is technically a precatalyst, as an active coordination site only becomes available upon initial reduction and subsequent loss of halide to form the catalyst, species A.

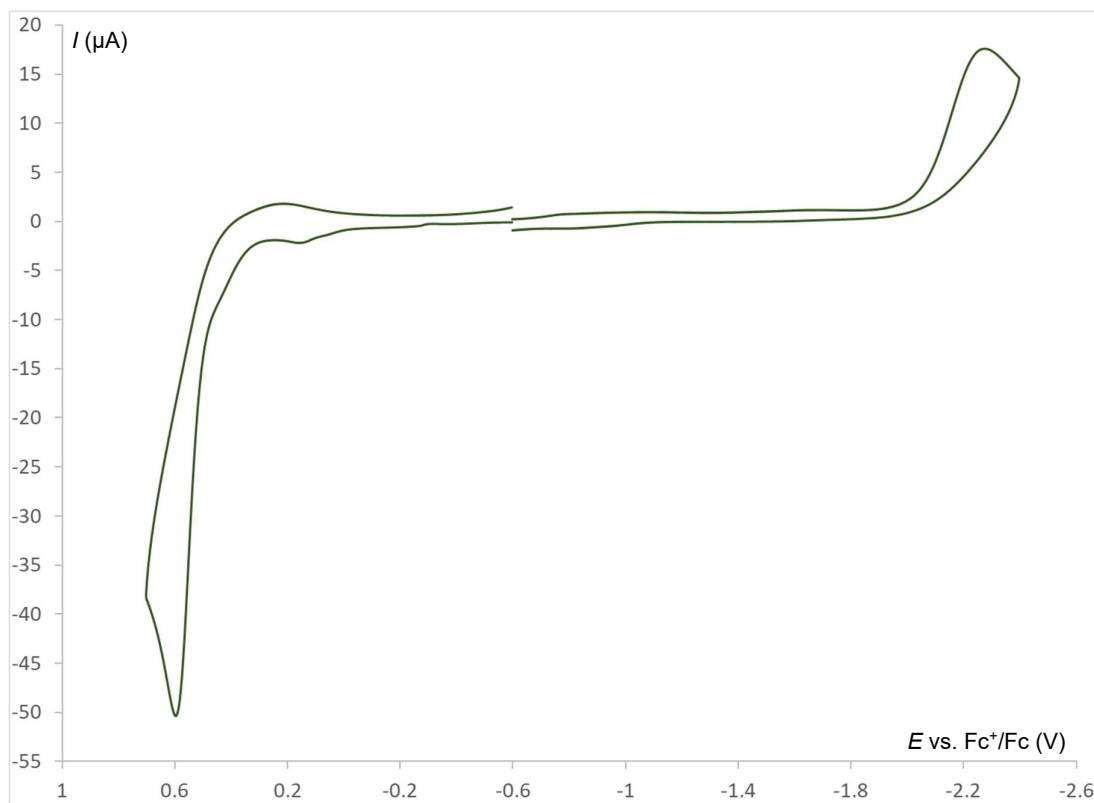

**Figure S1.** CV of 1.04 mM **Mn-1** recorded in 0.100 M Bu<sub>4</sub>NPF<sub>6</sub> in dry Ar-saturated acetonitrile on a 3.00 mm diameter glassy carbon electrode vs. Fc<sup>+</sup>/Fc at 0.100 V/s.

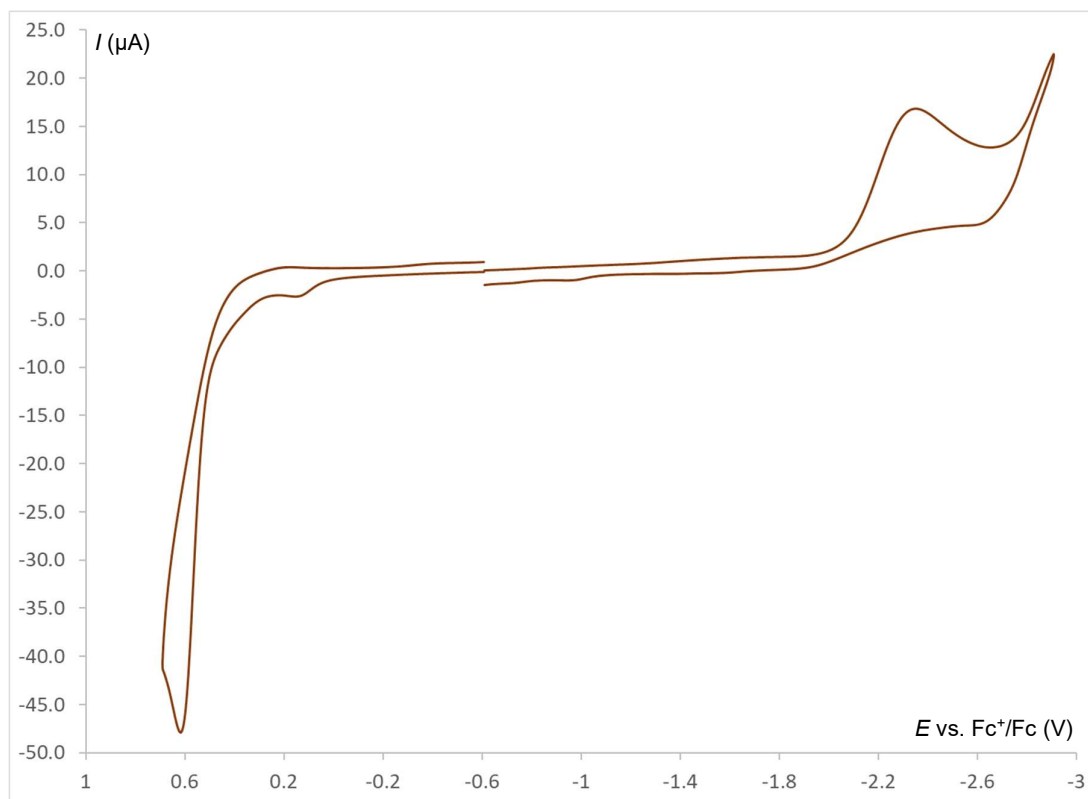

**Figure S2.** CV of 1.00 mM **Mn-2** recorded in 0.100 M  $\text{Bu}_4\text{NPF}_6$  in dry Ar-saturated acetonitrile on a 3.00 mm diameter glassy carbon electrode vs.  $\text{Fc}^+/\text{Fc}$  at 0.100 V/s.

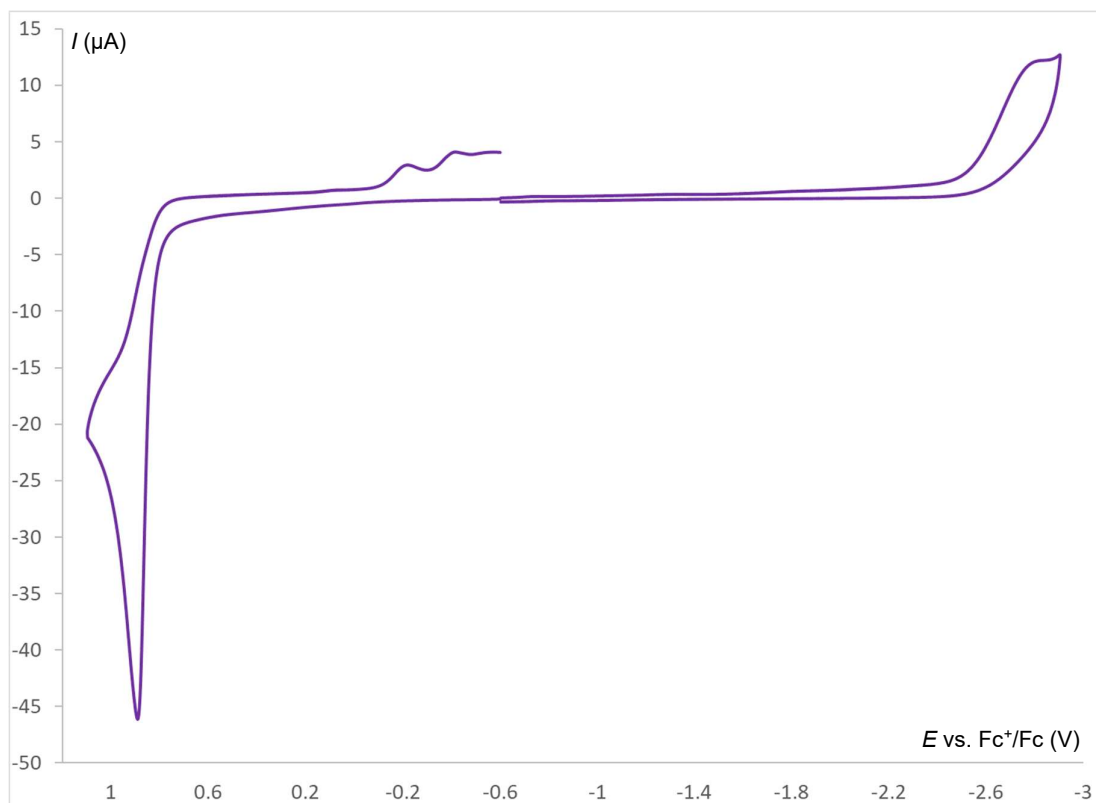

**Figure S3.** CV of 0.801 mM **Re-1** recorded in 0.100 M Bu<sub>4</sub>NPF<sub>6</sub> in dry Ar-saturated acetonitrile on a 3.00 mm diameter glassy carbon electrode vs. Fc<sup>+</sup>/Fc at 0.100 V/s.

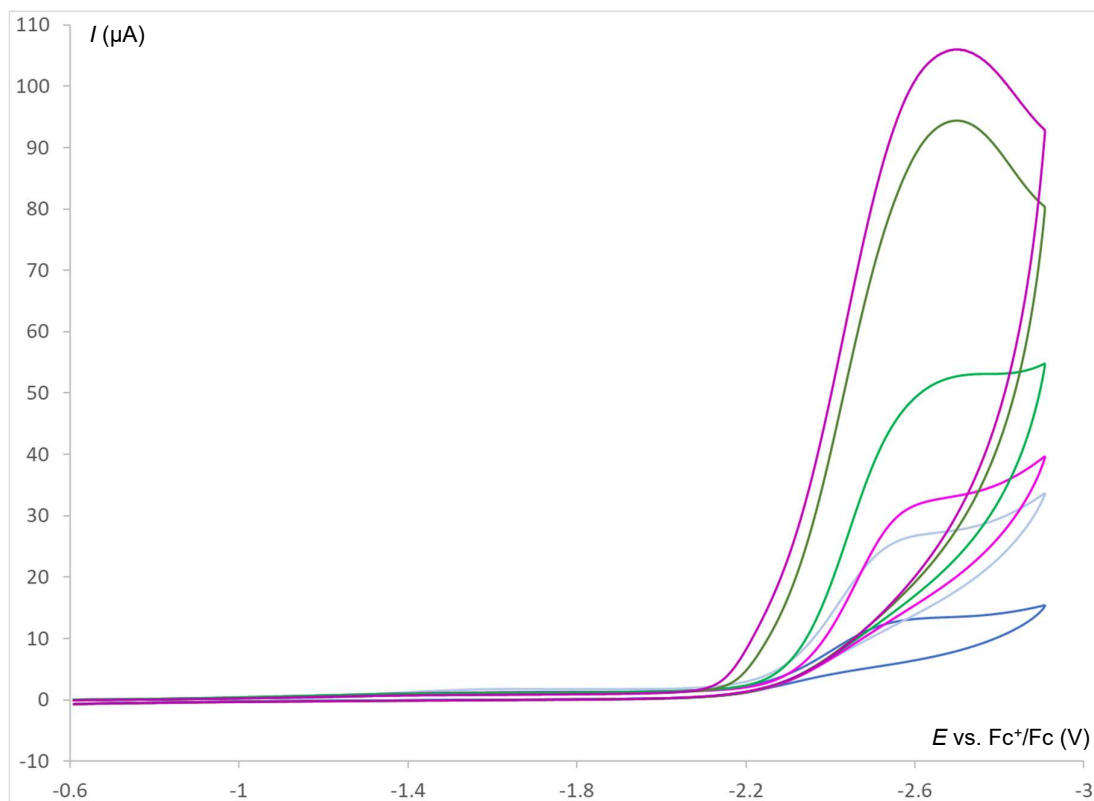

**Figure S4.** Cyclic voltammetry of 1.002 mM of **Mn-2** (blue) with subsequent additions of trifluoroethanol: 0.20 M, 0.50 M, 1.00 M, 1.50 M, 2.00 M. Recorded in 0.100 M  $\text{Bu}_4\text{NPF}_6$  in dry  $\text{CO}_2$ -saturated acetonitrile on a 3.00 mm diameter glassy carbon electrode vs.  $\text{Fc}^+/\text{Fc}$  at 0.100 V/s.

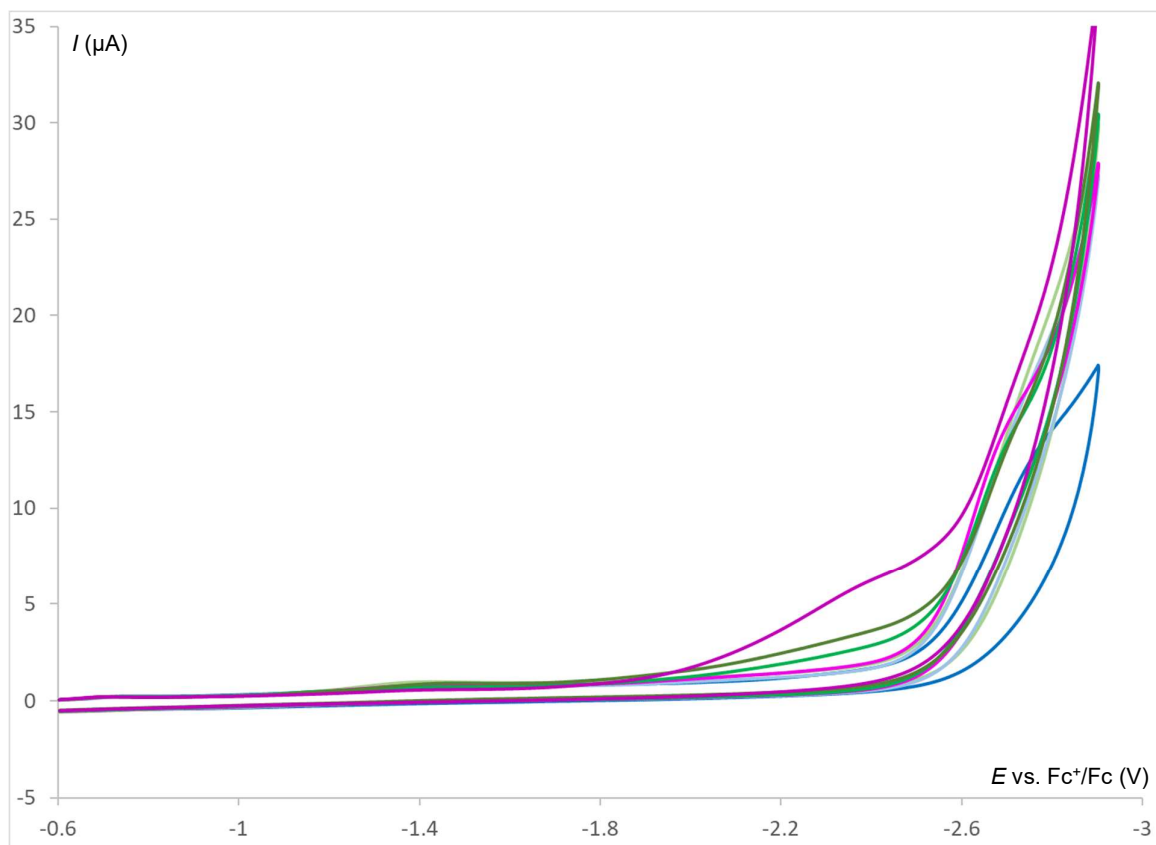

**Figure S5.** Cyclic voltammetry of 0.992 mM of **Re-1** (blue) with subsequent additions of trifluoroethanol: 0.10 M, 0.20 M, 0.50 M, 1.00 M, 1.50 M, 2.00 M. Recorded in 0.100 M  $\text{Bu}_4\text{NPF}_6$  in dry  $\text{CO}_2$ -saturated acetonitrile on a 3.00 mm diameter glassy carbon electrode vs.  $\text{Fc}^+/\text{Fc}$  at 0.100 V/s.

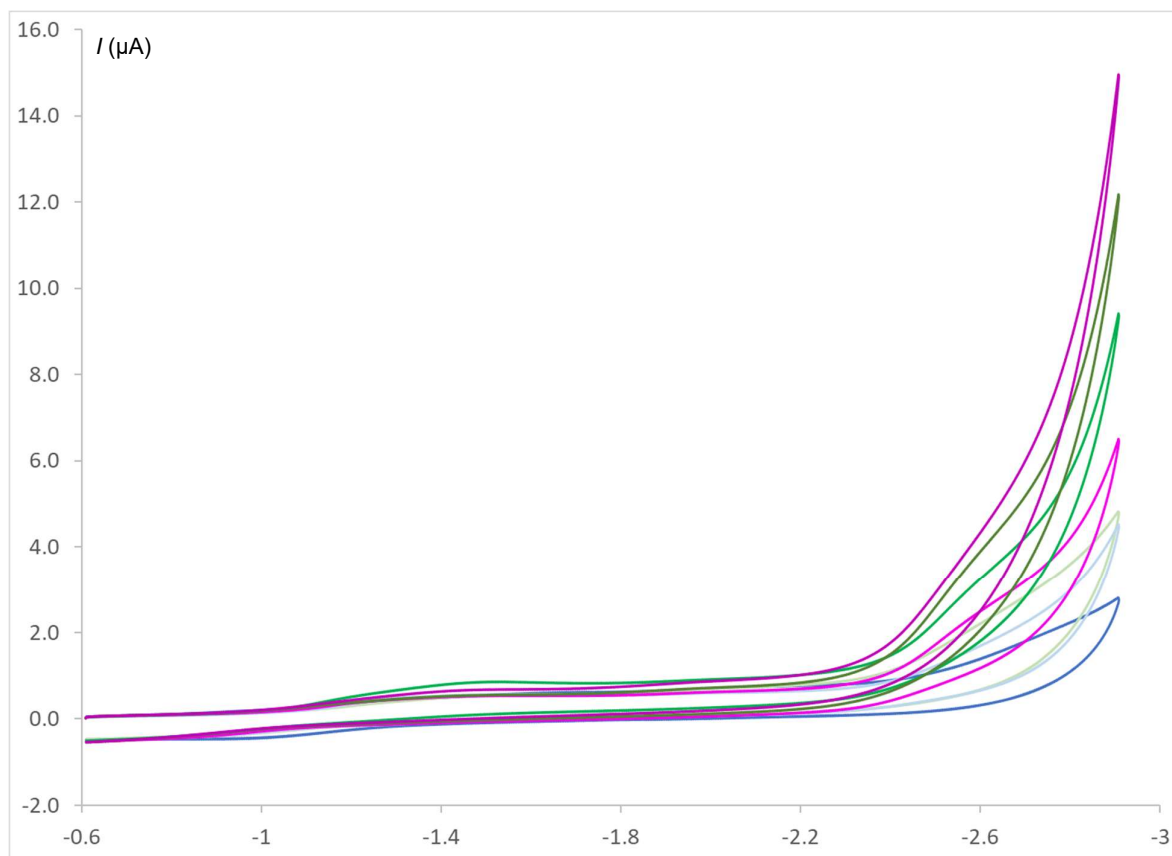

**Figure S6.** Cyclic voltammetry of electrolyte solution only (blue) with subsequent additions of trifluoroethanol: 0.10 M, 0.20 M, 0.50 M, 1.00 M, 1.50 M, 2.00 M. Recorded in 0.100 M  $\text{Bu}_4\text{NPF}_6$  in dry  $\text{CO}_2$ -saturated acetonitrile on a 3.00 mm diameter glassy carbon electrode vs.  $\text{Fc}^+/\text{Fc}$  at 0.100 V/s.



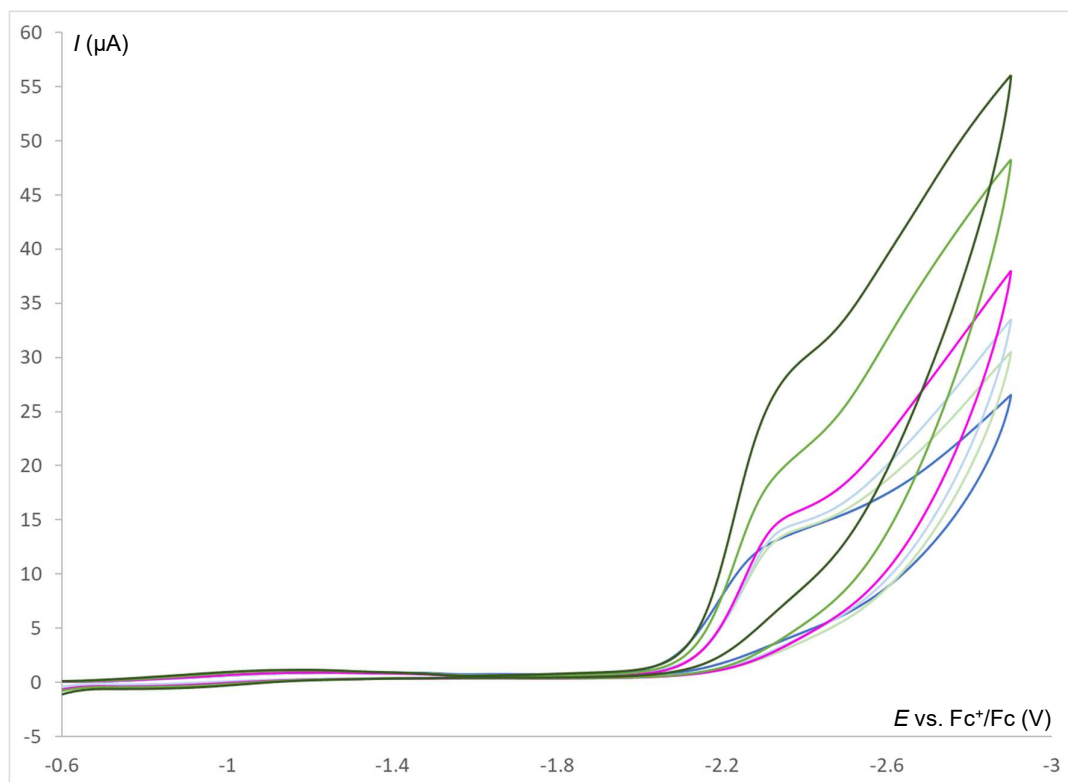

**Figure S7.** CV of 1.02 mM of **Mn-2** (blue) with subsequent additions of water: 0.05 M, 0.10 M, 0.20 M, 0.50 M and 1.00 M. Recorded in 0.100 M Bu<sub>4</sub>NPF<sub>6</sub> in dry CO<sub>2</sub>-saturated acetonitrile on a 3.00 mm diameter glassy carbon electrode vs. Fc<sup>+</sup>/Fc at 0.100 V/s.

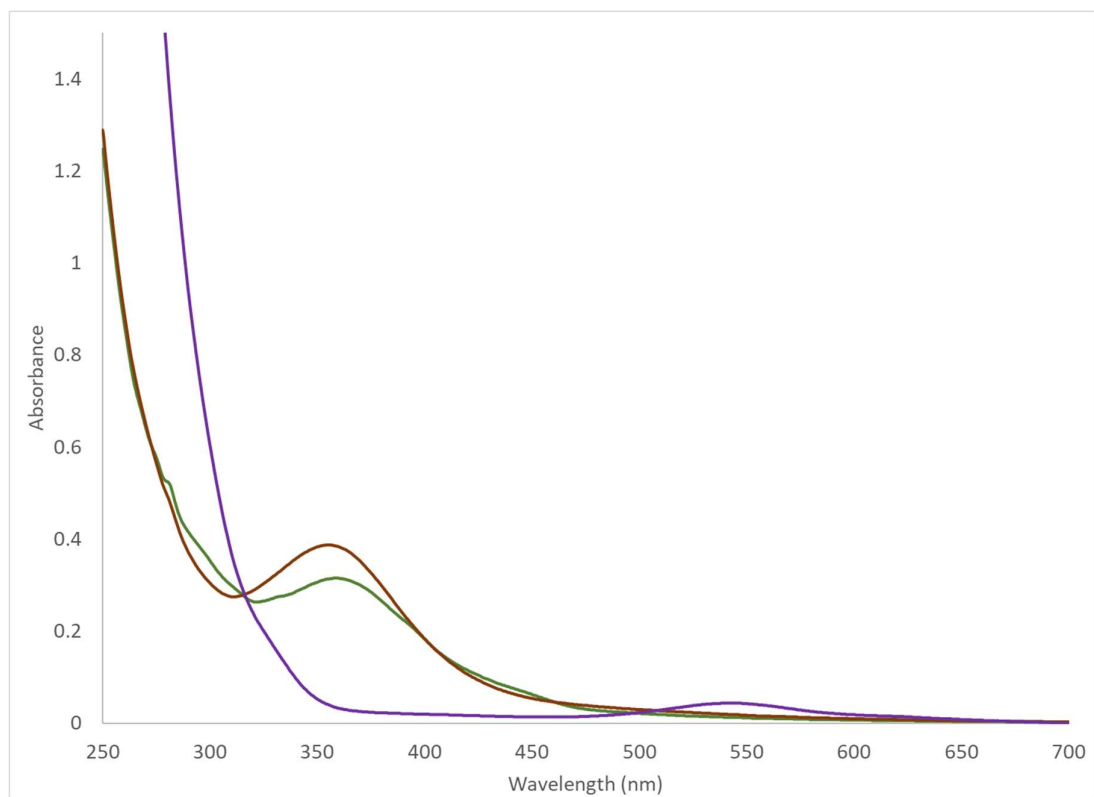

**Figure S8.** UV/Vis spectra of 0.200 mM **Mn-1** (green), 0.200 mM **Mn-2** (brown) and 0.500 mM **Re-1** (purple) in acetonitrile.

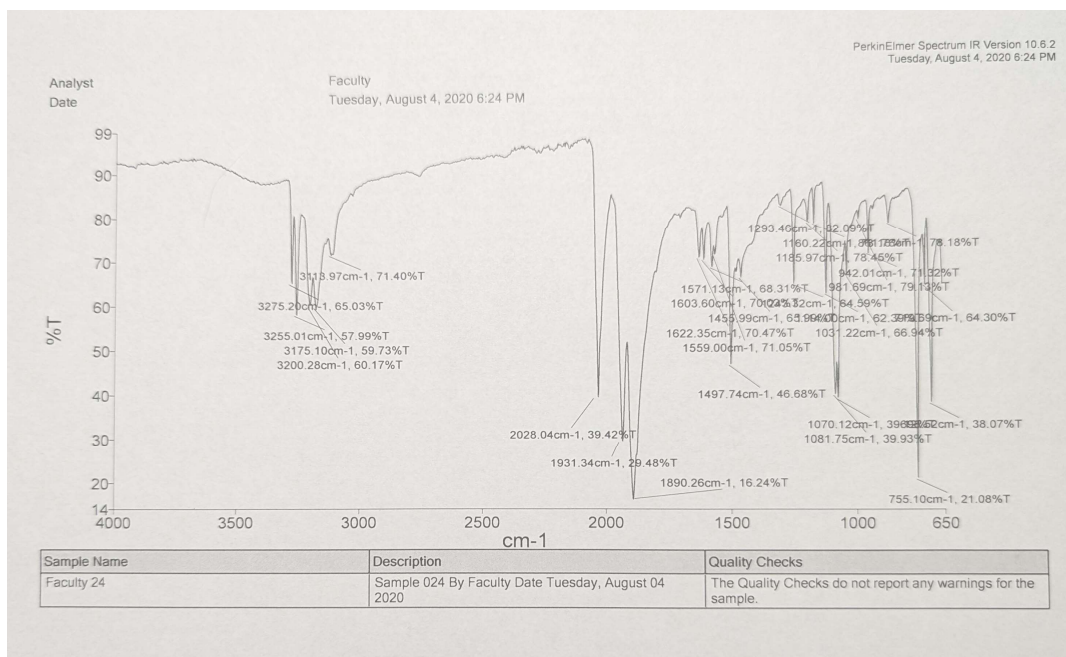

**Figure S9. FTIR Spectra of solid Mn-1.**

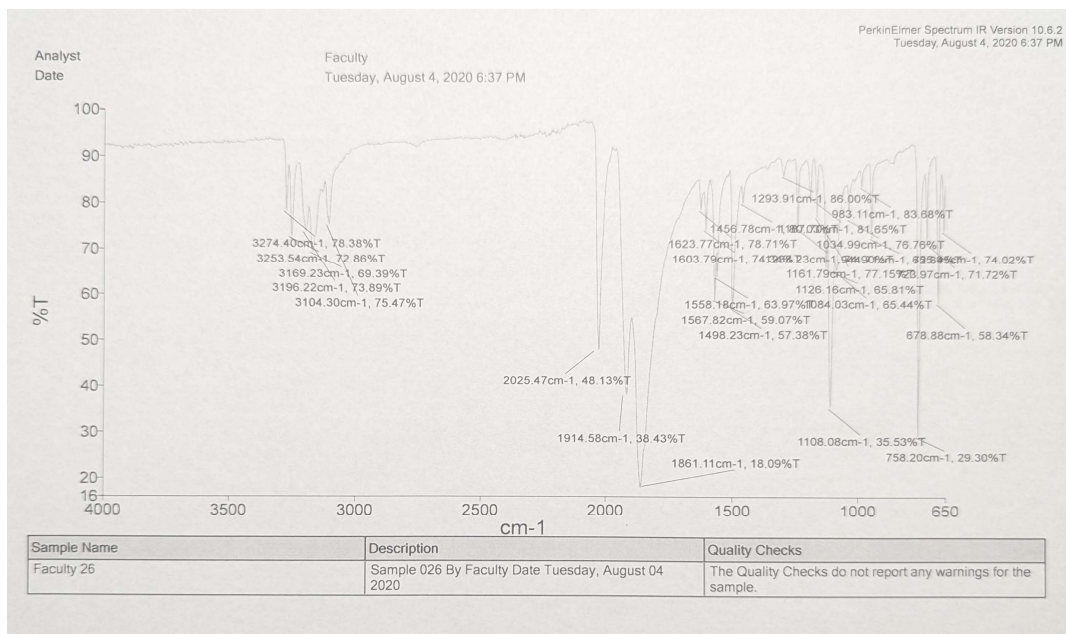

**Figure S10. FTIR Spectra of solid Re-1.**

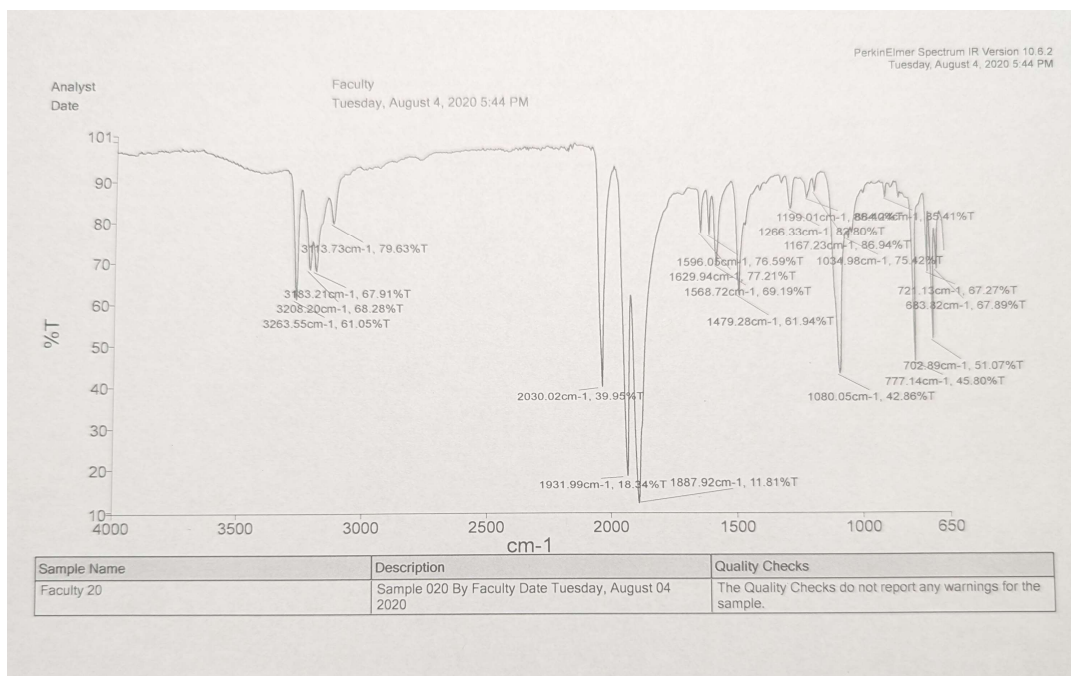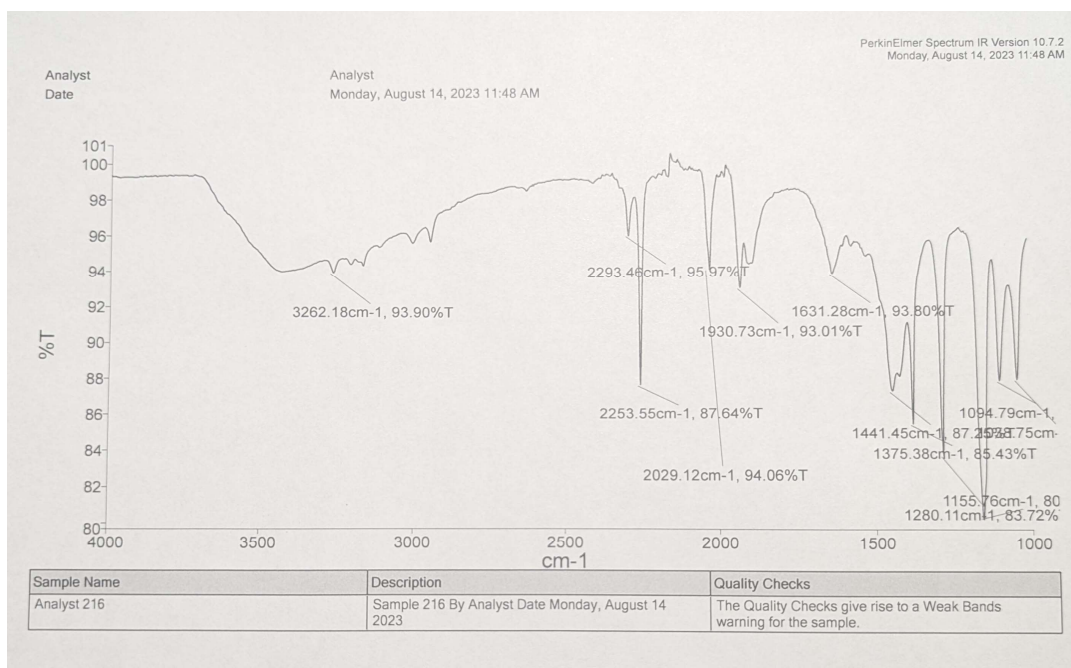

**Figure S11.** FTIR Spectra of solid **Mn-2** (top).

(bottom) FTIR Spectra of **Mn-2** in acetonitrile (2293 and 2254 cm<sup>-1</sup>) after bulk electrolysis in 1.50 M TFE, 0.100 M Bu<sub>4</sub>NPF<sub>6</sub> in dry CO<sub>2</sub>-saturated acetonitrile on a carbon rod electrode (surface area: 5.50 cm<sup>2</sup>) at -2.20 V vs Fc/Fc<sup>+</sup> for 90-minutes.

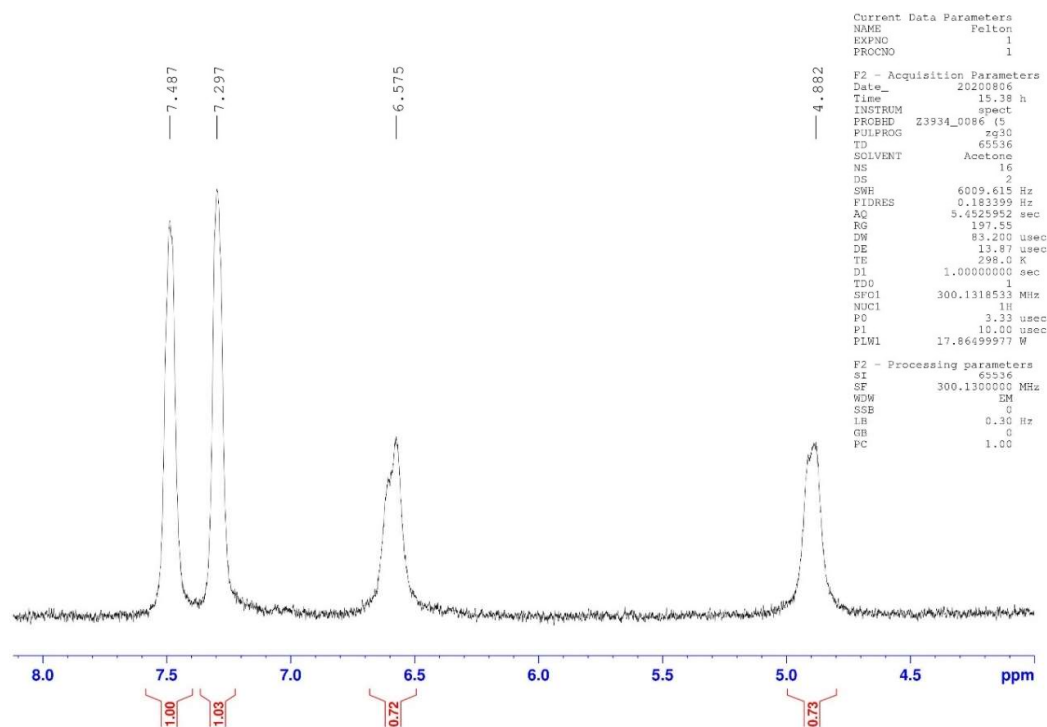

Figure S12.  $^1\text{H}$  NMR (300 MHz,  $(\text{CD}_3)_2\text{CO}$ ) spectra of **Mn-1**.

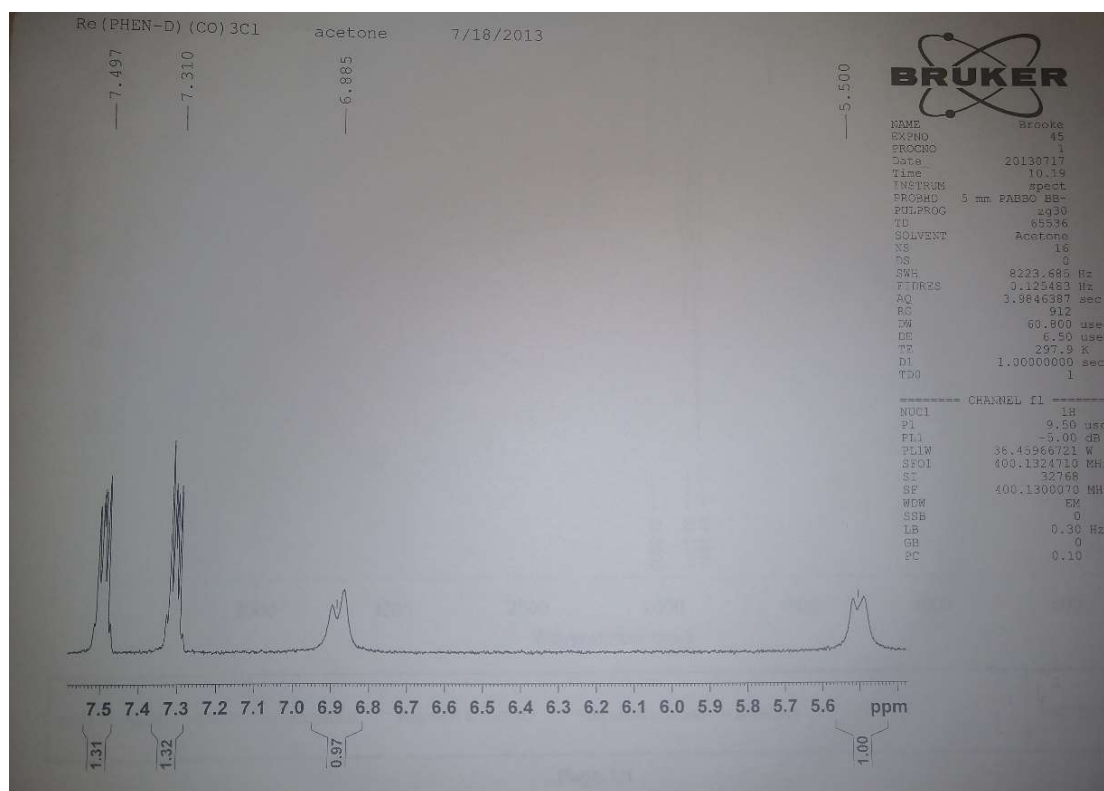

Figure S13.  $^1\text{H}$  NMR (400 MHz,  $(\text{CD}_3)_2\text{CO}$ ) spectra of **Re-1**.

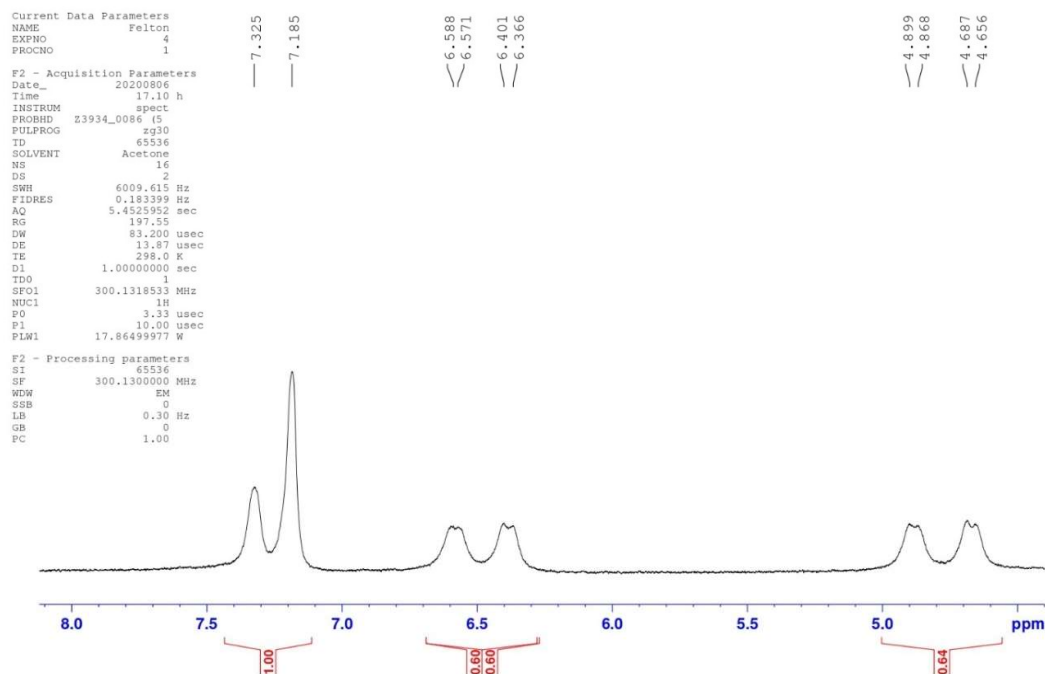

**Figure S14.**  $^1\text{H}$  NMR (300 MHz,  $(\text{CD}_3)_2\text{CO}$ ) spectra of **Mn-2**. Integration of the two peaks at 6.5 was carried out twice over overlapping regions to see if a different value could be obtained, yet both integrations yielded the same 0.60 value (hence 0.60 is shown above twice).

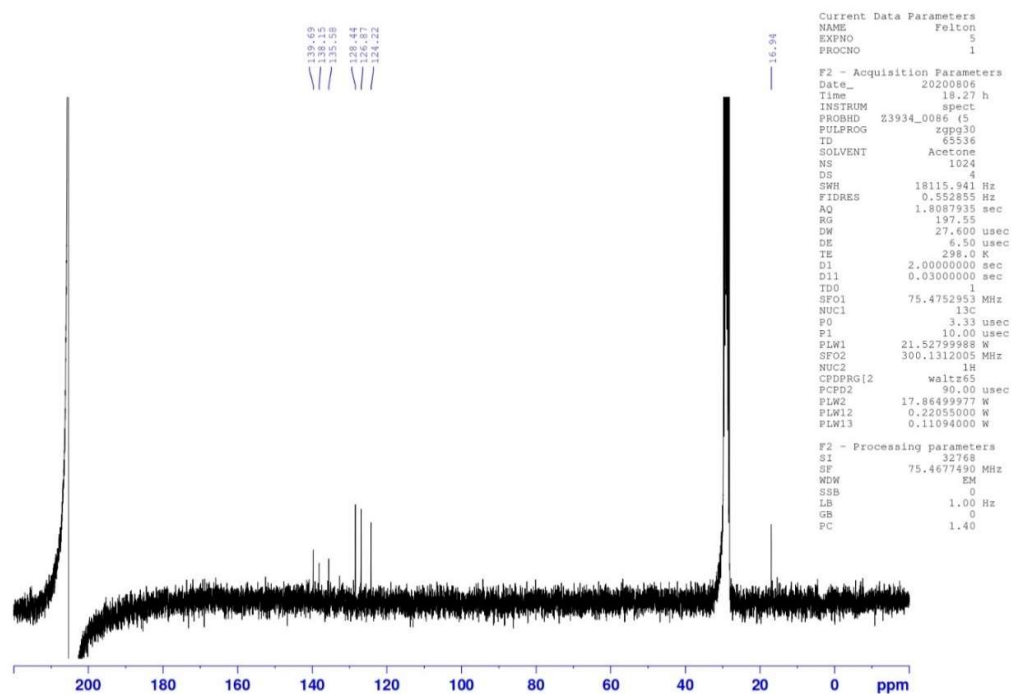

**Figure S15.**  $^{13}\text{C}$  NMR (75 MHz,  $(\text{CD}_3)_2\text{CO}$ ) spectra of **Mn-2**.

## Atlantic Microlab, Inc.

Sample No. Mn-1  
 6180 Atlantic Blvd. Suite M  
 Norcross, GA 30071  
 www.atlanticmicrolab.com

Company/School Eckerd College  
 Dept. Chemistry  
 Address 4200 54th Ave S  
 City, State, Zip St Petersburg, FL 33711

Professor/Supervisor: Greg Felton Name Greg Felton Date 10/14/2019  
 PO# / C#

| Element | Theory | Found |  | Single <input checked="" type="checkbox"/> Duplicate <input type="checkbox"/>                                                                                          |
|---------|--------|-------|--|------------------------------------------------------------------------------------------------------------------------------------------------------------------------|
| C       | 33.06  | 33.34 |  | Elements C, H, Br, Mn, N, O                                                                                                                                            |
| H       | 2.47   | 2.65  |  | Present:                                                                                                                                                               |
| N       | 8.57   | 8.42  |  | Analyze for:                                                                                                                                                           |
|         |        |       |  | Hygroscopic <input type="checkbox"/> Explosive <input type="checkbox"/>                                                                                                |
|         |        |       |  | M.P. _____ B.P. _____                                                                                                                                                  |
|         |        |       |  | To be dried: Yes <input type="checkbox"/> No <input type="checkbox"/>                                                                                                  |
|         |        |       |  | Temp. _____ Vac. _____ Time _____                                                                                                                                      |
|         |        |       |  | Rush Service <input type="checkbox"/> Rush service guarantees analyses will be completed and results available by 5 PM EST on the day the sample is received by 11 AM. |
|         |        |       |  | Include Email Address or FAX # Below                                                                                                                                   |
|         |        |       |  | feltonga@eckerd.edu                                                                                                                                                    |

Date Received OCT 15 2019 Date Completed OCT 16 2019  
 Remarks:

## Atlantic Microlab, Inc.

Sample No. Mn-2  
 6180 Atlantic Blvd. Suite M  
 Norcross, GA 30071  
 www.atlanticmicrolab.com

Company/School Eckerd College  
 Dept. Chemistry  
 Address 4200 54th Ave S  
 City, State, Zip St. Petersburg, FL 33711

Professor/Supervisor: Greg Felton Name Greg Felton Date 10/14/2019  
 PO# / C#

| Element | Theory | Found |  | Single <input checked="" type="checkbox"/> Duplicate <input type="checkbox"/>                                                                                          |
|---------|--------|-------|--|------------------------------------------------------------------------------------------------------------------------------------------------------------------------|
| C       | 35.22  | 35.50 |  | Elements C, H, Br, Mn, N, O                                                                                                                                            |
| H       | 2.96   | 2.94  |  | Present:                                                                                                                                                               |
| N       | 8.21   | 8.06  |  | Analyze for:                                                                                                                                                           |
|         |        |       |  | Hygroscopic <input type="checkbox"/> Explosive <input type="checkbox"/>                                                                                                |
|         |        |       |  | M.P. _____ B.P. _____                                                                                                                                                  |
|         |        |       |  | To be dried: Yes <input type="checkbox"/> No <input type="checkbox"/>                                                                                                  |
|         |        |       |  | Temp. _____ Vac. _____ Time _____                                                                                                                                      |
|         |        |       |  | Rush Service <input type="checkbox"/> Rush service guarantees analyses will be completed and results available by 5 PM EST on the day the sample is received by 11 AM. |
|         |        |       |  | Include Email Address or FAX # Below                                                                                                                                   |
|         |        |       |  | feltonga@eckerd.edu                                                                                                                                                    |

Date Received OCT 15 2019 Date Completed OCT 16 2019  
 Remarks:

## Atlantic Microlab, Inc.

Sample No. 1  
 6180 Atlantic Blvd. Suite M  
 Norcross, GA 30071  
 www.atlanticmicrolab.com

Company/School Eckerd College  
 Dept. Chemistry  
 Address 4200 54th Ave S  
 City, State, Zip St. Petersburg, FL 33711

Professor/Supervisor: Greg Felton Name Greg Felton Date 12/11/2019  
 PO# / C#

| Element | Theory | Found |  | Single <input checked="" type="checkbox"/> Duplicate <input type="checkbox"/>                                                                                          |
|---------|--------|-------|--|------------------------------------------------------------------------------------------------------------------------------------------------------------------------|
| C       | 26.12  | 26.37 |  | Elements <u>Re, Cl, C, H, O, N</u>                                                                                                                                     |
| H       | 1.95   | 1.88  |  | Present:                                                                                                                                                               |
| N       | 6.77   | 6.82  |  | Analyze <u>C, H, N</u>                                                                                                                                                 |
|         |        |       |  | for:                                                                                                                                                                   |
|         |        |       |  | Hygroscopic <input type="checkbox"/> Explosive <input type="checkbox"/>                                                                                                |
|         |        |       |  | M.P. _____ B.P. _____                                                                                                                                                  |
|         |        |       |  | To be dried: Yes <input type="checkbox"/> No <input checked="" type="checkbox"/>                                                                                       |
|         |        |       |  | Temp. _____ Vac. _____ Time _____                                                                                                                                      |
|         |        |       |  | Rush Service <input type="checkbox"/> Rush service guarantees analyses will be completed and results available by 5 PM EST on the day the sample is received by 11 AM. |
|         |        |       |  | Include Email Address or FAX # Below                                                                                                                                   |
|         |        |       |  | feltonga@eckerd.edu                                                                                                                                                    |

Date Received DEC 13 2019 Date Completed DEC 16 2019  
 Remarks:

**Figure S16.** Elemental analyses for Mn-1, Mn-2, Re-1.

**Table S1.** Comparison of found elemental analysis values vs theoretical values for proposed “diamine” compounds versus alternative “diimine” compounds.

|             | Found<br>C      H      N  | Theor. “diamine”<br>C      H      N                                                            | Theor. “diimine”<br>C      H      N                                                            |
|-------------|---------------------------|------------------------------------------------------------------------------------------------|------------------------------------------------------------------------------------------------|
| <b>Mn-1</b> | 33.34, <b>2.65</b> , 8.42 | C <sub>9</sub> H <sub>8</sub> BrN <sub>2</sub> O <sub>3</sub> Mn<br>33.06, <b>2.47</b> , 8.57  | C <sub>9</sub> H <sub>6</sub> BrN <sub>2</sub> O <sub>3</sub> Mn<br>33.26, <b>1.86</b> , 8.62  |
| <b>Mn-2</b> | 35.50, <b>2.94</b> , 8.06 | C <sub>10</sub> H <sub>10</sub> BrMnN <sub>2</sub> O <sub>3</sub><br>35.22, <b>2.96</b> , 8.21 | C <sub>10</sub> H <sub>10</sub> BrMnN <sub>2</sub> O <sub>3</sub><br>35.43, <b>2.38</b> , 8.26 |
| <b>Re-1</b> | 26.37, <b>1.88</b> , 6.82 | C <sub>9</sub> H <sub>8</sub> ClN <sub>2</sub> O <sub>3</sub> Re<br>26.12, <b>1.95</b> , 6.77  | C <sub>9</sub> H <sub>6</sub> ClN <sub>2</sub> O <sub>3</sub> Re<br>26.25, <b>1.47</b> , 6.80  |



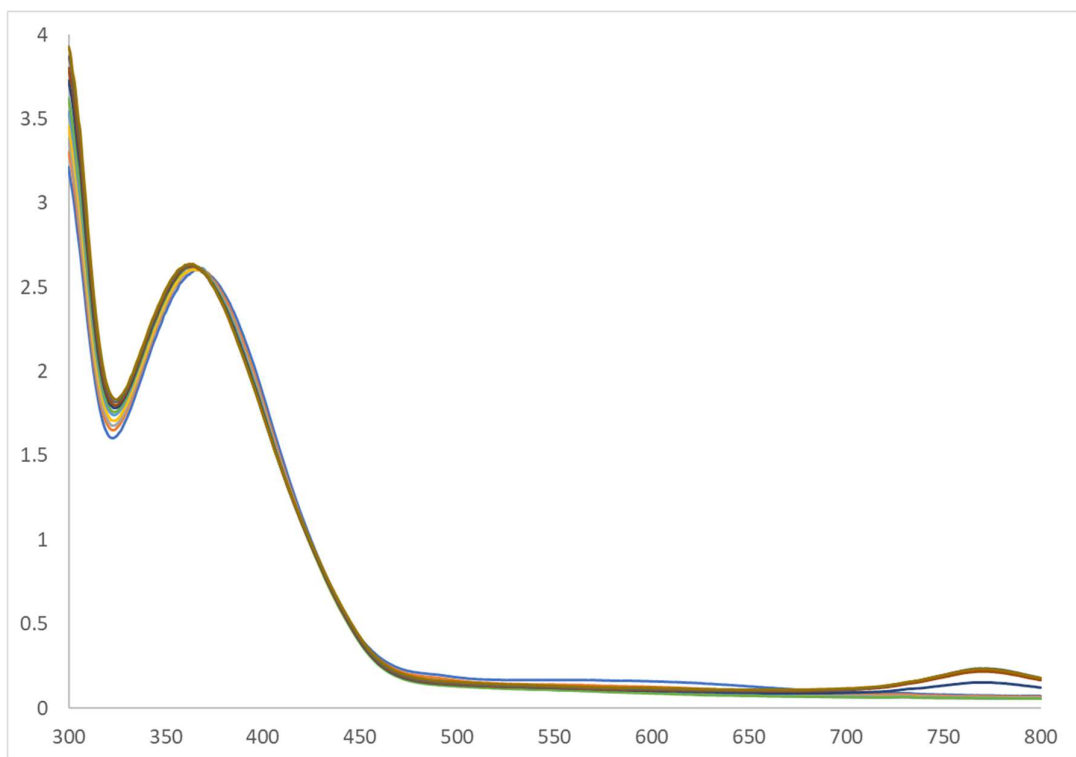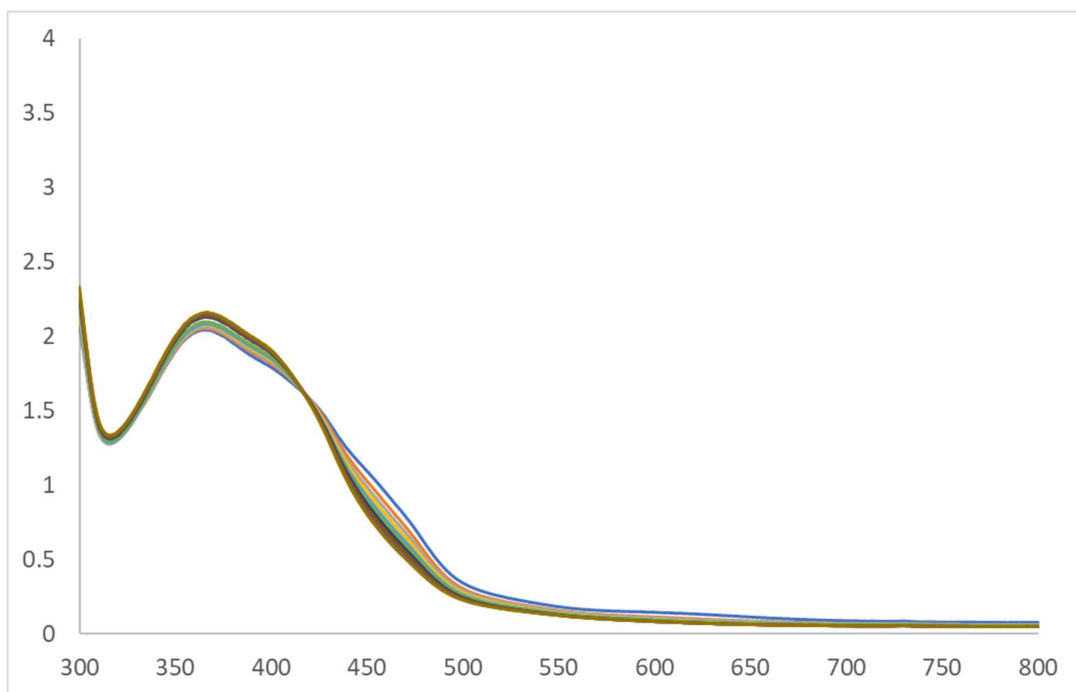

**Figure S17.** Decomposition study of **Mn-1** (top) and **Mn-2** (bottom) upon exposure of acetonitrile solution to ambient lab light in ten-minute time increments. **Re-1** showed no change over 90 minutes (data not shown)

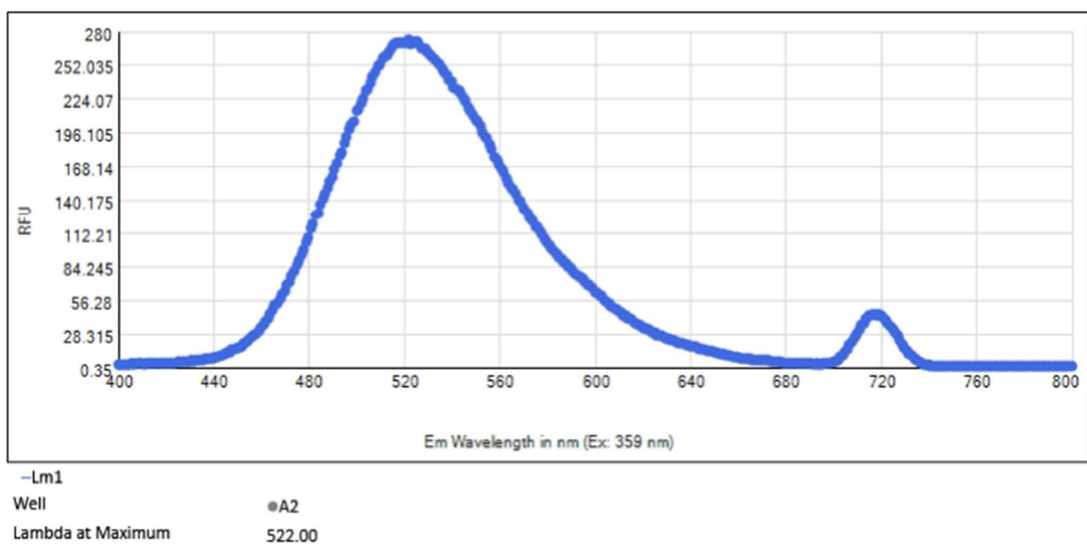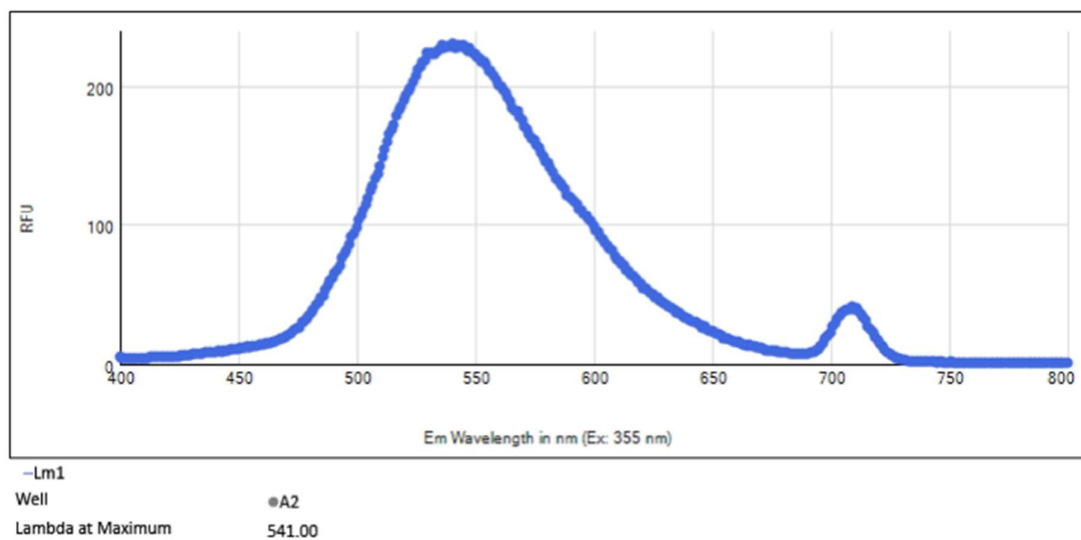

**Figure S18.** Fluorescence of **Mn-1** (top) and **Mn-2** (bottom) upon excitation at 359 and 355 nm, respectively, of 1.00 mM acetonitrile solution. **Re-1** showed no fluorescence with excitation at 261 or 543 nm (data not shown).

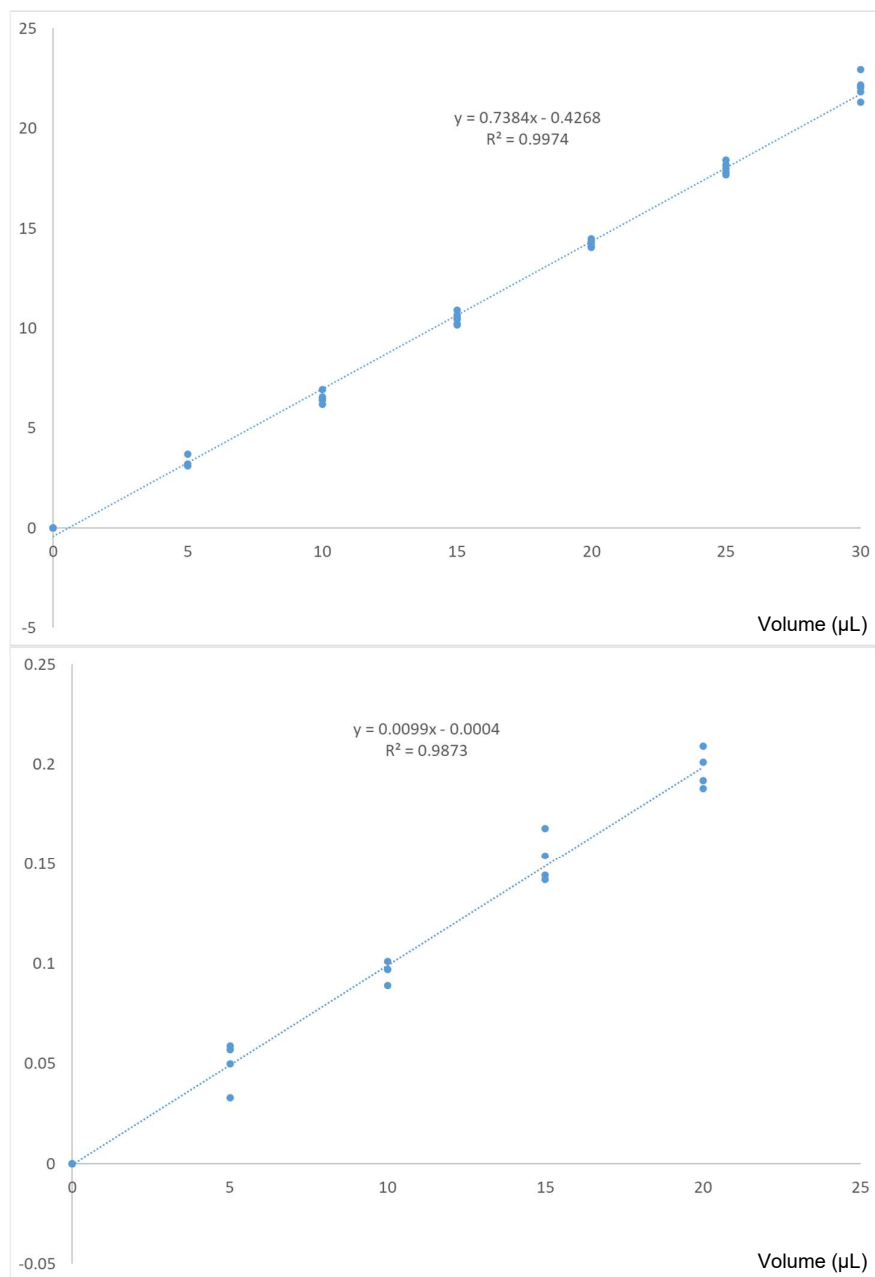

**Figure S19.** Calibration plot for CO (top) and H<sub>2</sub> (bottom) detection using a gas chromatograph with a thermal conductivity detector and He carrier gas. Neat samples were injected directly into the chromatograph from a gas-tight locking syringe. CO calibration used six injections (over two days) at the six volumes indicated. H<sub>2</sub> calibration used four injections (over two days) at the four volumes indicated. H<sub>2</sub> injections of larger volumes were not linear in response and were not used (beyond 30 μL area integration included negative regions).

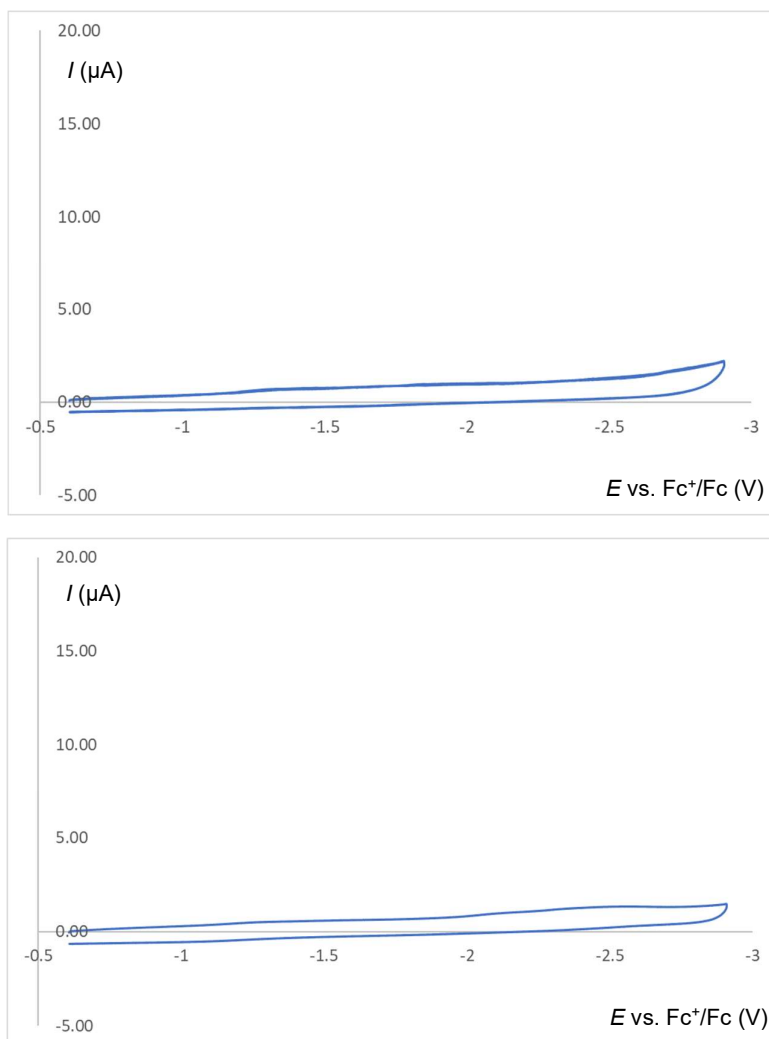

**Figure S20.** Background Cyclic voltammetry recorded in only 0.100 M  $\text{Bu}_4\text{NPF}_6$  in argon-saturated acetonitrile (top) and in dry  $\text{CO}_2$ -saturated acetonitrile (bottom) on a 3.00 mm diameter glassy carbon electrode vs.  $\text{Fc}^+/\text{Fc}$  at 0.100 V/s.

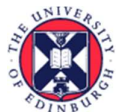

Submitted by: **Felton, G.**

Dr Gary S. Nichol  
Crystallography Service Manager  
Phone: +44 (0)131 650 4806  
E-mail: g.s.nichol@ed.ac.uk

Solved by: **Nichol, G.S.**

Sample ID: **Mn-2**

Compound sample 3 was provided as a dark brown crystalline residue suitable for single crystal X-ray diffraction, yielding structure ex4013.

## Crystal Data and Experimental

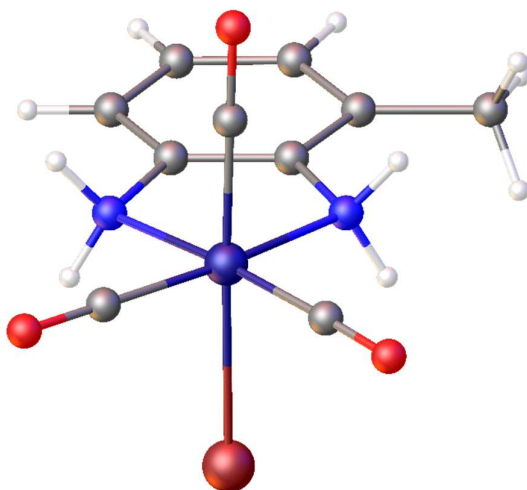

**Experimental.** Single dark brown plate-shaped crystals of (**Mn-2**) were recrystallised from a mixture of hexane, acetone and DCM by vapour diffusion. A suitable crystal ( $0.24 \times 0.13 \times 0.03 \text{ mm}^3$ ) was selected and mounted on a MITIGEN holder in Paratone oil on a Agilent Technologies SuperNova diffractometer. The crystal was kept at  $T = 120.0 \text{ K}$  during data collection. Using **Olex2** (Dolomanov et al., 2009), the structure was solved with the **ShelXS** (Sheldrick, 2008) structure solution program, using the Direct Methods solution method. The model was refined with version 2014/6 of **ShelXL** (Sheldrick, 2008) using Least Squares minimisation.

**Crystal Data.**  $\text{C}_{10}\text{H}_{10}\text{BrMnN}_2\text{O}_3$ ,  $M_r = 341.05$ , orthorhombic, Pbca (No. 61),  $a = 12.5019(5) \text{ \AA}$ ,  $b = 11.6126(5) \text{ \AA}$ ,  $c = 17.3371(9) \text{ \AA}$ ,  $\alpha = \beta = \gamma = 90^\circ$ ,  $V = 2517.01(19) \text{ \AA}^3$ ,  $T = 120.0 \text{ K}$ ,  $Z = 8$ ,  $Z' = 1$ ,  $\mu (\text{CuK}\alpha) = 12.257$ , 20449 reflections measured, 2626 unique ( $R_{\text{int}} = 0.0507$ ) which were used in all calculations. The final  $wR_2$  was 0.1185 (all data) and  $R_1$  was 0.0439 ( $I > 2(I)$ ).

| Compound                              | Mn-2                                                 |
|---------------------------------------|------------------------------------------------------|
| CCDC                                  | <b>1893661</b>                                       |
| Formula                               | $\text{C}_{10}\text{H}_{10}\text{BrMnN}_2\text{O}_3$ |
| $D_{\text{calc.}} / \text{g cm}^{-3}$ | 1.800                                                |
| $\mu / \text{mm}^{-1}$                | 12.257                                               |
| Formula Weight                        | 341.05                                               |
| Colour                                | dark brown                                           |
| Shape                                 | plate                                                |
| Max Size/mm                           | 0.24                                                 |
| Mid Size/mm                           | 0.13                                                 |
| Min Size/mm                           | 0.03                                                 |
| $T/\text{K}$                          | 120.0                                                |
| Crystal System                        | orthorhombic                                         |
| Space Group                           | Pbca                                                 |
| $a/\text{\AA}$                        | 12.5019(5)                                           |
| $b/\text{\AA}$                        | 11.6126(5)                                           |
| $c/\text{\AA}$                        | 17.3371(9)                                           |
| $\alpha/^\circ$                       | 90                                                   |
| $\beta/^\circ$                        | 90                                                   |
| $\gamma/^\circ$                       | 90                                                   |
| $V/\text{\AA}^3$                      | 2517.01(19)                                          |
| $Z$                                   | 8                                                    |
| $Z'$                                  | 1                                                    |
| $\theta_{\text{min}}/^\circ$          | 5.102                                                |
| $\theta_{\text{max}}/^\circ$          | 77.022                                               |
| Measured Refl.                        | 20449                                                |
| Independent Refl.                     | 2626                                                 |
| Reflections Used                      | 2314                                                 |
| $R_{\text{int}}$                      | 0.0507                                               |
| Parameters                            | 229                                                  |
| Restraints                            | 15                                                   |
| Largest Peak                          | 0.779                                                |
| Deepest Hole                          | -1.078                                               |
| GooF                                  | 1.132                                                |
| $wR_2$ (all data)                     | 0.1185                                               |
| $wR_2$                                | 0.1145                                               |
| $R_1$ (all data)                      | 0.0494                                               |
| $R_1$                                 | 0.0439                                               |

**Experimental Extended.** A dark brown plate-shaped crystal with dimensions  $0.24 \times 0.13 \times 0.03 \text{ mm}^3$  was mounted on on a MITIGEN holder in Paratone oil. Data were collected using a Agilent Technologies SuperNova diffractometer equipped with an Oxford Cryosystems Cryostream 700+ low-temperature apparatus operating at  $T = 120.0 \text{ K}$ .

Data were measured using  $\omega$  scans scans of  $1.0^\circ$  per frame for 1.2 s using  $\text{CuK}\alpha$  radiation (sealed X-ray tube). The total number of runs and images was based on the strategy calculation from the program CrysAlisPro (Agilent, V1.171.37.34k, 2014). The actually achieved resolution was  $\Theta = 77.022$ .

Cell parameters were retrieved using the CrysAlisPro (Agilent, V1.171.37.34k, 2014) software and refined using CrysAlisPro (Agilent, V1.171.37.34k, 2014) on 6728 reflections, 33 of the observed reflections.

Data reduction was performed using the CrysAlisPro (Agilent, V1.171.37.34k, 2014) software which corrects for Lorentz polarisation. The final completeness is 100.00 out to  $77.022$  in  $\Theta$ . The absorption coefficient (MU) of this material is 12.257 and the minimum and maximum transmissions are 0.976 and 0.996.

The structure was solved by Direct Methods using the **ShelXS** (Sheldrick, 2008) structure solution program and refined by Least Squares using version 2014/6 of **ShelXL** (Sheldrick, 2008).

The structure was solved in the space group  $\text{Pbca}$  (# 61). All non-hydrogen atoms were refined anisotropically. Hydrogen atom positions were calculated geometrically and refined using the riding model.

The 3-methylbenzene-1,2-diamine ligand was modelled as disorderd over two sites, as indicated by peaks in a difference electron density map, with occupancy ratio 0.702:0.298(11). The geometry of the minor component, indicated by atoms with a prime suffix, was restrained to be similar to that of the major component, and displacement ellipsoid restraints were used on the nitrogen atoms of the minor component. C4 and C4-prime were constrained to have the same co-ordinates and displacement ellipsoid parameters.

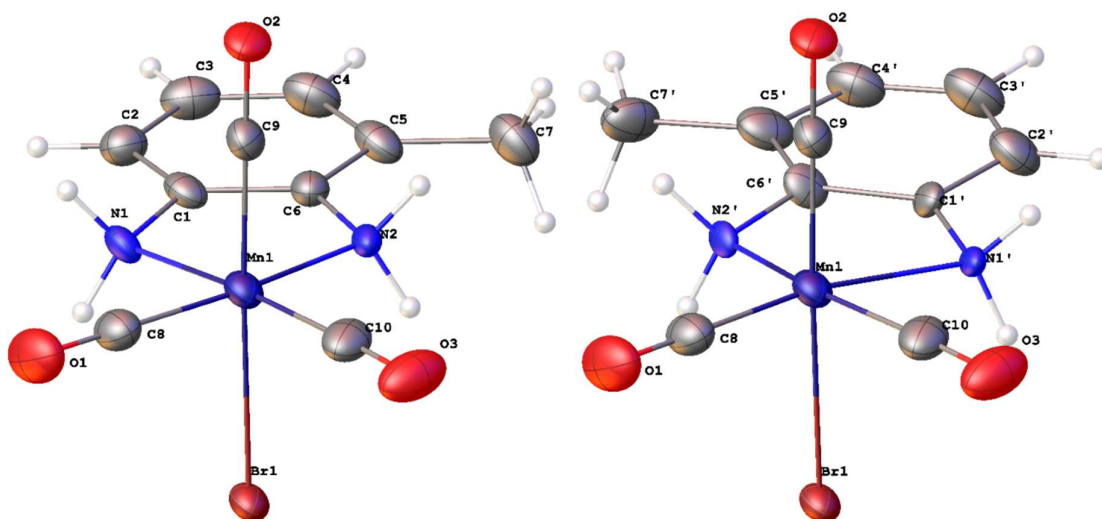

**Figure S21.** Major and minor component of **Mn-2** (30% ORTEP)

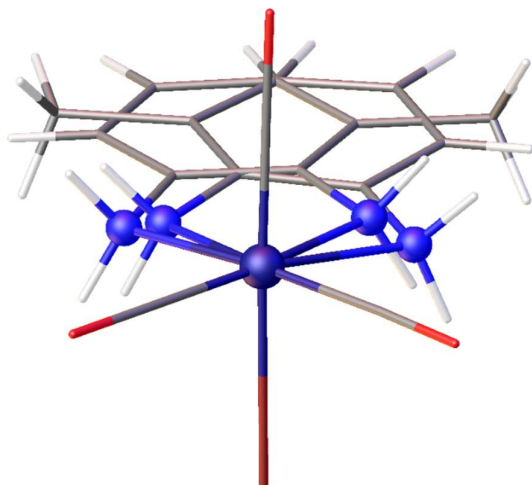

**Figure S22.** Major and minor component of **Mn-2** overlapped

#### Reflection Statistics

|                             |                                  |                       |                |
|-----------------------------|----------------------------------|-----------------------|----------------|
| Total reflections           | 21994                            | Unique reflections    | 2626           |
| Completeness                | 0.987                            | Mean I/sigma          | 21.19          |
| Max hkl collected           | (15, 14, 21)                     | Min hkl collected     | (-15, -8, -21) |
| Max hkl used                | (15, 14, 21)                     | Min hkl used          | (0, 0, 0)      |
| Lim d max                   | 100.0                            | Lim d min             | 0.77           |
| d max used                  | 12.5                             | d min used            | 0.79           |
| Friedel pairs               | 2241                             | Friedel pairs merged  | 1              |
| Inconsistent equivalents    | 0                                | $R_{int}$             | 0.0507         |
| $R_{\sigma}$                | 0.0235                           | Intensity transformed | 0              |
| Omitted reflections         | 0                                | Omitted by user       | 20             |
| Multiplicity                | (6254, 3146, 1459, 924, 239, 30) | ReflectionAPotMax     | 23             |
| Removed Systematic Absences | 1525                             | Filtered Off          | 0              |

**Table S2.** Bond Lengths in Å for **Mn-2**.

| Atom | Atom | Length/Å  |
|------|------|-----------|
| Br1  | Mn1  | 2.5464(8) |
| Mn1  | N1   | 2.094(11) |
| Mn1  | N2   | 2.067(8)  |
| Mn1  | C8   | 1.792(5)  |
| Mn1  | C9   | 1.787(5)  |
| Mn1  | C10  | 1.791(6)  |
| Mn1  | N1'  | 2.179(17) |
| Mn1  | N2'  | 2.05(2)   |
| O1   | C8   | 1.155(6)  |
| O2   | C9   | 1.151(6)  |
| O3   | C10  | 1.145(7)  |
| N1   | C1   | 1.474(11) |
| N2   | C6   | 1.453(13) |
| C1   | C2   | 1.382(14) |
| C1   | C6   | 1.372(12) |

| Atom | Atom | Length/Å  |
|------|------|-----------|
| C2   | C3   | 1.389(13) |
| C3   | C4   | 1.340(10) |
| C4   | C5   | 1.388(10) |
| C5   | C6   | 1.409(12) |
| C5   | C7   | 1.497(12) |
| N1'  | C1'  | 1.44(2)   |
| N2'  | C6'  | 1.43(2)   |
| C1'  | C2'  | 1.375(19) |
| C1'  | C6'  | 1.366(19) |
| C2'  | C3'  | 1.377(19) |
| C3'  | C4'  | 1.332(16) |
| C4'  | C5'  | 1.427(17) |
| C5'  | C6'  | 1.404(17) |
| C5'  | C7'  | 1.49(3)   |

**Table S3.** Bond Angles in ° for **Mn-2**.

| Atom | Atom | Atom | Angle/°    |
|------|------|------|------------|
| N1   | Mn1  | Br1  | 86.9(3)    |
| N2   | Mn1  | Br1  | 87.01(19)  |
| N2   | Mn1  | N1   | 80.5(3)    |
| C8   | Mn1  | Br1  | 90.98(16)  |
| C8   | Mn1  | N1   | 89.6(3)    |
| C8   | Mn1  | N2   | 170.0(3)   |
| C8   | Mn1  | N1'  | 171.0(5)   |
| C8   | Mn1  | N2'  | 103.7(5)   |
| C9   | Mn1  | Br1  | 177.47(16) |
| C9   | Mn1  | N1   | 93.2(3)    |
| C9   | Mn1  | N2   | 90.5(2)    |
| C9   | Mn1  | C8   | 91.5(2)    |
| C9   | Mn1  | C10  | 91.2(2)    |
| C9   | Mn1  | N1'  | 95.4(4)    |
| C9   | Mn1  | N2'  | 94.3(6)    |
| C10  | Mn1  | Br1  | 88.68(16)  |
| C10  | Mn1  | N1   | 175.6(3)   |
| C10  | Mn1  | N2   | 99.5(3)    |
| C10  | Mn1  | C8   | 90.3(3)    |
| C10  | Mn1  | N1'  | 83.9(6)    |
| C10  | Mn1  | N2'  | 164.8(5)   |
| N1'  | Mn1  | Br1  | 82.1(4)    |
| N2'  | Mn1  | Br1  | 85.2(6)    |
| N2'  | Mn1  | N1'  | 81.5(6)    |
| C1   | N1   | Mn1  | 112.1(6)   |
| C6   | N2   | Mn1  | 113.3(5)   |
| C2   | C1   | N1   | 122.4(8)   |
| C6   | C1   | N1   | 116.2(10)  |
| C6   | C1   | C2   | 121.4(10)  |
| C1   | C2   | C3   | 118.3(9)   |
| C4   | C3   | C2   | 119.7(8)   |
| C3   | C4   | C5   | 124.3(6)   |
| C4   | C5   | C6   | 115.5(7)   |
| C4   | C5   | C7   | 122.6(7)   |
| C6   | C5   | C7   | 121.9(8)   |
| C1   | C6   | N2   | 117.2(10)  |
| C1   | C6   | C5   | 120.7(10)  |
| C5   | C6   | N2   | 122.0(8)   |
| O1   | C8   | Mn1  | 179.9(7)   |

| Atom | Atom | Atom | Angle/°   |
|------|------|------|-----------|
| O2   | C9   | Mn1  | 179.7(5)  |
| O3   | C10  | Mn1  | 177.9(5)  |
| C1'  | N1'  | Mn1  | 105.9(10) |
| C6'  | N2'  | Mn1  | 111.9(13) |
| C2'  | C1'  | N1'  | 117.7(15) |
| C6'  | C1'  | N1'  | 120.8(14) |
| C6'  | C1'  | C2'  | 121.5(17) |
| C1'  | C2'  | C3'  | 118.4(18) |
| C4'  | C3'  | C2'  | 122.7(17) |
| C3'  | C4'  | C5'  | 119.3(11) |
| C4'  | C5'  | C7'  | 123.9(16) |
| C6'  | C5'  | C4'  | 118.2(14) |
| C6'  | C5'  | C7'  | 117.9(17) |
| C1'  | C6'  | N2'  | 117.3(15) |
| C1'  | C6'  | C5'  | 119.5(17) |
| C5'  | C6'  | N2'  | 123.1(17) |



Submitted by: **Greg Felton**



THE UNIVERSITY of EDINBURGH  
Crystal Structure Service

Solved by: **Gary S Nichol**

Sample ID: **Re-1**

Dr Gary S. Nichol  
Crystallography Service Manager  
Phone: +44 (0)131 650 4806  
E-mail: g.s.nichol@ed.ac.uk

Compound Re-diamine was provided as dark red crystals suitable for single crystal X-ray diffraction, yielding structure EX16036.

## Crystal Data and Experimental

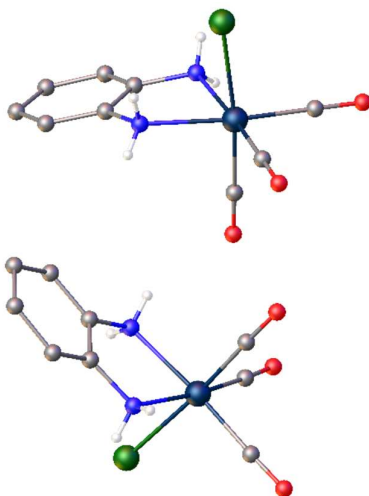

**Experimental.** Single dark red block-shaped crystals of (**Re-1**) were recrystallised from diethyl ether by slow evaporation. A suitable crystal (0.17×0.14×0.09) mm<sup>3</sup> was selected and mounted on a MITIGEN holder in Paratone oil on a Rigaku Oxford Diffraction SuperNova diffractometer. The crystal was kept at  $T = 120.0$  K during data collection. Using **Olex2** (Dolomanov et al., 2009), the structure was solved with the **ShelXS** (Sheldrick, 2008) structure solution program, using the Direct Methods solution method. The model was refined with version 2014/7 of **ShelXL** (Sheldrick, 2015) using Least Squares minimisation.

**Crystal Data.** C<sub>9</sub>H<sub>8</sub>ClN<sub>2</sub>O<sub>3</sub>Re,  $M_r = 413.82$ , triclinic, P-1 (No. 2),  $a = 9.3117(3)$  Å,  $b = 11.5100(4)$  Å,  $c = 12.3513(4)$  Å,  $\alpha = 110.072(3)^\circ$ ,  $\beta = 101.473(3)^\circ$ ,  $\gamma = 107.544(3)^\circ$ ,  $V = 1115.93(7)$  Å<sup>3</sup>,  $T = 120.0$  K,  $Z = 4$ ,  $Z' = 2$ ,  $\mu(\text{MoK}\alpha) = 11.120$ , 30060 reflections measured, 5717 unique ( $R_{\text{int}} = 0.0480$ ) which were used in all calculations. The final  $wR_2$  was 0.0668 (all data) and  $R_1$  was 0.0295 ( $I > 2(I)$ ).

| Compound                              | Re-1                                                             |
|---------------------------------------|------------------------------------------------------------------|
| CCDC                                  | 1893660                                                          |
| Formula                               | C <sub>9</sub> H <sub>8</sub> ClN <sub>2</sub> O <sub>3</sub> Re |
| $D_{\text{calc.}} / \text{g cm}^{-3}$ | 2.463                                                            |
| $\mu / \text{mm}^{-1}$                | 11.120                                                           |
| Formula Weight                        | 413.82                                                           |
| Colour                                | dark red                                                         |
| Shape                                 | block                                                            |
| Size/mm <sup>3</sup>                  | 0.17×0.14×0.09                                                   |
| $T/\text{K}$                          | 120.0                                                            |
| Crystal System                        | triclinic                                                        |
| Space Group                           | P-1                                                              |
| $a/\text{\AA}$                        | 9.3117(3)                                                        |
| $b/\text{\AA}$                        | 11.5100(4)                                                       |
| $c/\text{\AA}$                        | 12.3513(4)                                                       |
| $\alpha/^\circ$                       | 110.072(3)                                                       |
| $\beta/^\circ$                        | 101.473(3)                                                       |
| $\gamma/^\circ$                       | 107.544(3)                                                       |
| $V/\text{\AA}^3$                      | 1115.93(7)                                                       |
| $Z$                                   | 4                                                                |
| $Z'$                                  | 2                                                                |
| Wavelength/Å                          | 0.71073                                                          |
| Radiation type                        | MoK $\alpha$                                                     |
| $\theta_{\text{min}}/^\circ$          | 3.141                                                            |
| $\theta_{\text{max}}/^\circ$          | 29.698                                                           |
| Measured Refl.                        | 30060                                                            |
| Independent Refl.                     | 5717                                                             |
| Reflections Used                      | 4872                                                             |
| $R_{\text{int}}$                      | 0.0480                                                           |
| Parameters                            | 313                                                              |
| Restraints                            | 15                                                               |
| Largest Peak                          | 2.578                                                            |
| Deepest Hole                          | -0.915                                                           |
| GooF                                  | 1.063                                                            |
| $wR_2$ (all data)                     | 0.0668                                                           |
| $wR_2$                                | 0.0626                                                           |
| $R_1$ (all data)                      | 0.0390                                                           |
| $R_1$                                 | 0.0295                                                           |

## Structure Quality Indicators

|                     |       |       |             |      |          |       |                                   |       |
|---------------------|-------|-------|-------------|------|----------|-------|-----------------------------------|-------|
| <b>Reflections:</b> | d min | 0.72  | I/ $\sigma$ | 20.2 | Rint     | 4.80% | complete<br>at $2\theta=53^\circ$ | 90%   |
| <b>Refinement:</b>  | Shift | 0.003 | Max Peak    | 2.6  | Min Peak | -0.9  | GooF                              | 1.063 |

A dark red block-shaped crystal with dimensions  $0.17 \times 0.14 \times 0.09$  mm<sup>3</sup> was mounted on a MITIGEN holder in Paratone oil. X-ray diffraction data were collected using a Rigaku Oxford Diffraction SuperNova diffractometer equipped with a Oxford Cryosystems Cryostream 700+ low-temperature device, operating at  $T = 120.0$  K.

Data were measured using  $\omega$  scans scans of  $1.0^\circ$  per frame for 2.5 s using MoK $\alpha$  radiation (micro-focus sealed X-ray tube, 50 kV, 0.8 mA). The total number of runs and images was based on the strategy calculation from the program CrysAlisPro (Agilent). The maximum resolution achieved was  $\theta = 29.698^\circ$

Cell parameters were retrieved using the CrysAlisPro (Agilent) software and refined using CrysAlisPro (Agilent) on 13691 reflections, 46 % of the observed reflections. Data reduction was performed using the CrysAlisPro (Agilent) software which corrects for Lorentz polarisation. The final completeness is 99.80 out to  $29.698^\circ$  in  $\theta$ . The absorption coefficient  $\mu$  of this material is 11.120 at this wavelength ( $\lambda = 0.71073$ ) and the minimum and maximum transmissions are 0.891 and 0.940.

The structure was solved in the space group P-1 (# 2) by Direct Methods using the **ShelXS** (Sheldrick, 2008) structure solution program and refined by Least Squares using version 2014/7 of **ShelXL** (Sheldrick, 2015). All non-hydrogen atoms were refined anisotropically. Hydrogen atom positions were calculated geometrically and refined using the riding model.

*\_refine\_special\_details*: N-bound H atoms were located in a difference Fourier map and refined with appropriate distance restraints.

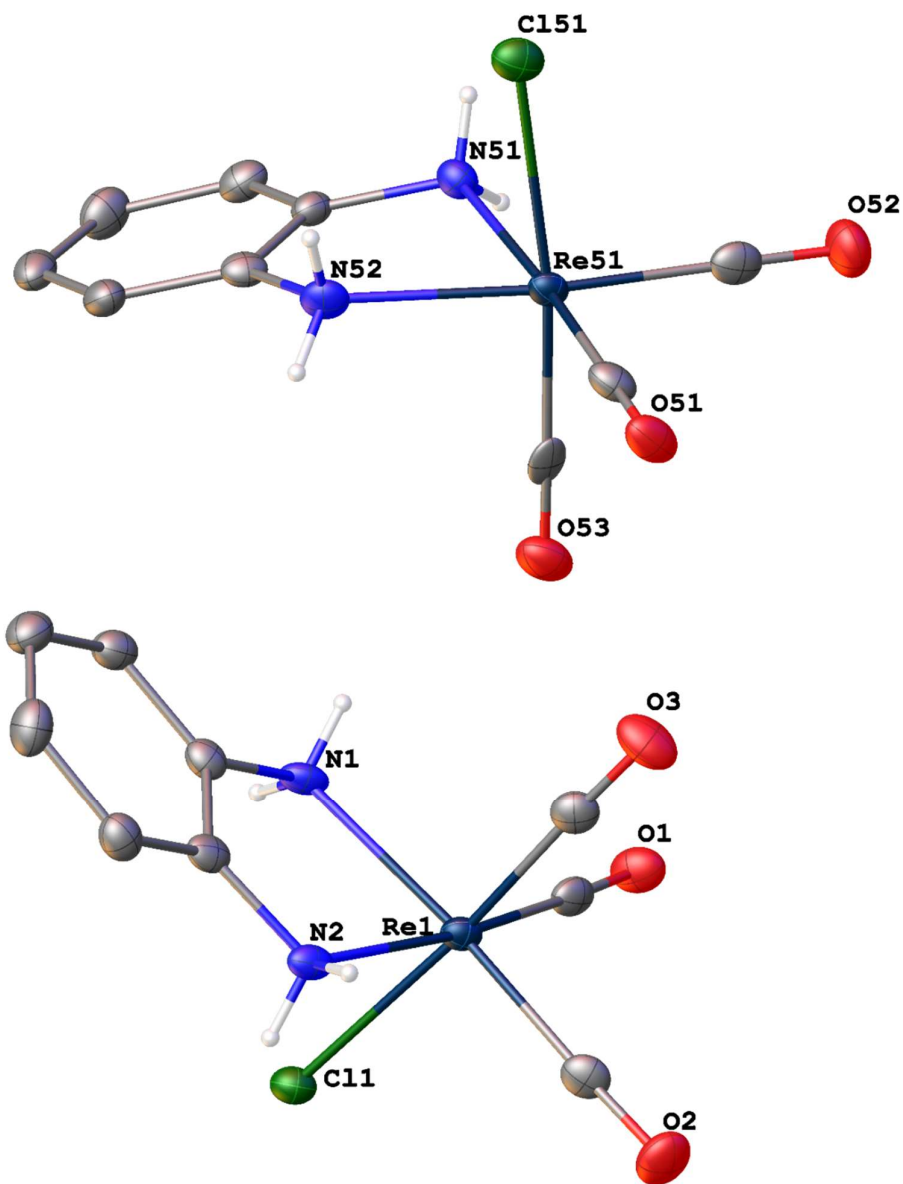

**Figure S23:** The asymmetric unit of **Re-1**. Displacement ellipsoids are at the 50% probability level.

### Reflection Statistics

|                                     |                                                                              |                            |                 |
|-------------------------------------|------------------------------------------------------------------------------|----------------------------|-----------------|
| Total reflections (after filtering) | 30060                                                                        | Unique reflections         | 5717            |
| Completeness                        | 0.904                                                                        | Mean $I/\sigma$            | 20.19           |
| $hkl_{\max}$ collected              | (12, 15, 17)                                                                 | $hkl_{\min}$ collected     | (-12, -16, -17) |
| $hkl_{\max}$ used                   | (12, 14, 17)                                                                 | $hkl_{\min}$ used          | (-12, -16, 0)   |
| Lim $d_{\max}$ collected            | 100.0                                                                        | Lim $d_{\min}$ collected   | 0.36            |
| $d_{\max}$ used                     | 6.48                                                                         | $d_{\min}$ used            | 0.72            |
| Friedel pairs                       | 5033                                                                         | Friedel pairs merged       | 1               |
| Inconsistent equivalents            | 0                                                                            | $R_{\text{int}}$           | 0.048           |
| $R_{\text{sigma}}$                  | 0.038                                                                        | Intensity transformed      | 0               |
| Omitted reflections                 | 0                                                                            | Omitted by user (OMIT hkl) | 0               |
| Multiplicity                        | (2605, 2945, 2151, 1480, 850, Maximum multiplicity 392, 164, 85, 35, 26, 17) |                            | 16              |
| Removed systematic absences         | 0                                                                            | Filtered off (Shel/OMIT)   | 0               |

**Table S4.** Bond Lengths in Å for **Re-1**.

| Atom | Atom | Length/Å   |
|------|------|------------|
| Re1  | Cl1  | 2.5103(12) |
| Re1  | N1   | 2.204(4)   |
| Re1  | N2   | 2.193(4)   |
| Re1  | C7   | 1.911(5)   |
| Re1  | C8   | 1.916(5)   |
| Re1  | C9   | 1.901(5)   |
| O1   | C7   | 1.153(6)   |
| O2   | C8   | 1.149(6)   |
| O3   | C9   | 1.156(6)   |
| N1   | C1   | 1.463(6)   |
| N2   | C2   | 1.448(6)   |
| C1   | C2   | 1.391(7)   |
| C1   | C6   | 1.385(7)   |
| C2   | C3   | 1.387(7)   |
| C3   | C4   | 1.379(7)   |
| C4   | C5   | 1.398(8)   |
| C5   | C6   | 1.376(7)   |

| Atom | Atom | Length/Å   |
|------|------|------------|
| Re51 | Cl51 | 2.4911(13) |
| Re51 | N51  | 2.197(4)   |
| Re51 | N52  | 2.212(4)   |
| Re51 | C57  | 1.921(5)   |
| Re51 | C58  | 1.916(5)   |
| Re51 | C59  | 1.926(6)   |
| O51  | C57  | 1.149(6)   |
| O52  | C58  | 1.156(6)   |
| O53  | C59  | 1.102(6)   |
| N51  | C51  | 1.454(6)   |
| N52  | C52  | 1.465(6)   |
| C51  | C52  | 1.381(7)   |
| C51  | C56  | 1.383(7)   |
| C52  | C53  | 1.390(7)   |
| C53  | C54  | 1.380(7)   |
| C54  | C55  | 1.387(8)   |
| C55  | C56  | 1.383(7)   |

**Table S5.** Bond Angles in ° for **Re-1**.

| Atom | Atom | Atom | Angle/°    |
|------|------|------|------------|
| N1   | Re1  | Cl1  | 81.13(12)  |
| N2   | Re1  | Cl1  | 81.06(11)  |
| N2   | Re1  | N1   | 77.19(15)  |
| C7   | Re1  | Cl1  | 95.18(15)  |
| C7   | Re1  | N1   | 95.19(18)  |
| C7   | Re1  | N2   | 171.90(17) |
| C7   | Re1  | C8   | 90.5(2)    |
| C8   | Re1  | Cl1  | 97.19(16)  |
| C8   | Re1  | N1   | 174.20(17) |
| C8   | Re1  | N2   | 97.09(17)  |
| C9   | Re1  | Cl1  | 174.88(15) |
| C9   | Re1  | N1   | 95.23(19)  |
| C9   | Re1  | N2   | 94.66(18)  |
| C9   | Re1  | C7   | 88.7(2)    |
| C9   | Re1  | C8   | 86.1(2)    |
| C1   | N1   | Re1  | 112.3(3)   |
| C2   | N2   | Re1  | 113.2(3)   |
| C2   | C1   | N1   | 117.5(4)   |
| C6   | C1   | N1   | 122.2(4)   |
| C6   | C1   | C2   | 120.3(5)   |
| C1   | C2   | N2   | 117.8(4)   |
| C3   | C2   | N2   | 122.4(4)   |
| C3   | C2   | C1   | 119.7(5)   |
| C4   | C3   | C2   | 120.1(5)   |
| C3   | C4   | C5   | 119.8(5)   |
| C6   | C5   | C4   | 120.2(5)   |
| C5   | C6   | C1   | 119.8(5)   |
| O1   | C7   | Re1  | 178.0(4)   |
| O2   | C8   | Re1  | 177.4(5)   |
| O3   | C9   | Re1  | 178.1(5)   |

| Atom | Atom | Atom | Angle/°    |
|------|------|------|------------|
| N51  | Re51 | Cl51 | 81.29(12)  |
| N51  | Re51 | N52  | 76.72(15)  |
| N52  | Re51 | Cl51 | 81.04(12)  |
| C57  | Re51 | Cl51 | 96.13(15)  |
| C57  | Re51 | N51  | 174.75(18) |
| C57  | Re51 | N52  | 98.40(18)  |
| C57  | Re51 | C59  | 90.0(2)    |
| C58  | Re51 | Cl51 | 96.45(16)  |
| C58  | Re51 | N51  | 96.10(18)  |
| C58  | Re51 | N52  | 172.65(18) |
| C58  | Re51 | C57  | 88.7(2)    |
| C58  | Re51 | C59  | 89.2(2)    |
| C59  | Re51 | Cl51 | 171.72(14) |
| C59  | Re51 | N51  | 92.12(18)  |
| C59  | Re51 | N52  | 92.61(18)  |
| C51  | N51  | Re51 | 112.1(3)   |
| C52  | N52  | Re51 | 111.4(3)   |
| C52  | C51  | N51  | 117.8(4)   |
| C52  | C51  | C56  | 120.7(4)   |
| C56  | C51  | N51  | 121.4(4)   |
| C51  | C52  | N52  | 117.5(4)   |
| C51  | C52  | C53  | 119.6(5)   |
| C53  | C52  | N52  | 122.8(4)   |
| C54  | C53  | C52  | 119.8(5)   |
| C53  | C54  | C55  | 120.2(5)   |
| C56  | C55  | C54  | 120.1(5)   |
| C51  | C56  | C55  | 119.5(5)   |
| O51  | C57  | Re51 | 178.9(5)   |
| O52  | C58  | Re51 | 177.9(5)   |
| O53  | C59  | Re51 | 178.7(4)   |

## Citations

O.V. Dolomanov and L.J. Bourhis and R.J. Gildea and J.A.K. Howard and H. Puschmann, Olex2: A complete structure solution, refinement and analysis program, *J. Appl. Cryst.*, (2009), **42**, 339-341.

Sheldrick, G.M., A short history of ShelX, *Acta Cryst.*, (2008), **A64**, 339-341.

Sheldrick, G.M., Crystal structure refinement with ShelXL, *Acta Cryst.*, (2015), **C27**, 3-8.
